# Supplementary material
Source: publisher figshare collection journal article supplement (https://gsajournals.figshare.com/ndownloader/files/11402351)
Supplement: Supplementary file 1 [file 11402351]

## Sheet: Sheet1
Table S2: Genes significantly dysregulated in kdm5[140] wing imaginal discs (FDR 5%)
Flybase Ref	Log2FoldChange	Standard error	p adjusted	Gene Name	ChIP positive? Liu et al	ChIP positive? Lloret-Llinares et al
FBgn0263219	-7.06329	0.140843	0	Dscam4	NO	NO
FBgn0037548	-3.45239	0.184396	4.34504e-75	CG7900	NO	NO
FBgn0039827	-2.91593	0.181873	7.88297e-55	CG1544	NO	NO
FBgn0035770	-2.58827	0.105212	3.90525e-130	pst	YES	NO
FBgn0037902	-2.38194	0.149818	6.06859e-54	CG5281	NO	NO
FBgn0086704	-2.20223	0.193622	2.12465e-27	stops	NO	NO
FBgn0038693	-2.16735	0.188976	7.41114e-28	unc79	NO	NO
FBgn0030349	-2.09002	0.0809176	1.97044e-143	CG10353	YES	NO
FBgn0036764	-2.0338	0.153849	3.98362e-37	CG5535	NO	NO
FBgn0262483	-1.86712	0.191394	4.45091e-20	Rbp	NO	NO
FBgn0267160	-1.7348	0.17952	1.01299e-19	CR45600	NO	NO
FBgn0027552	-1.7031	0.16221	2.64008e-23	CG10863	NO	NO
FBgn0038290	-1.62028	0.187838	1.01407e-15	CG6912	NO	NO
FBgn0004878	-1.58382	0.191619	2.04559e-14	cas	NO	NO
FBgn0011770	-1.54513	0.113416	1.95145e-39	Gip	NO	NO
FBgn0038694	-1.49656	0.193474	1.33056e-12	CG5217	NO	NO
FBgn0035477	-1.48733	0.193368	1.82204e-12	CG14982	NO	NO
FBgn0051755	-1.47851	0.193687	2.65902e-12	SoYb	NO	NO
FBgn0260795	-1.46511	0.07132	1.67912e-90	NaPi-III	NO	NO
FBgn0040717	-1.45648	0.16792	6.78805e-16	Nplp4	NO	NO
FBgn0264745	-1.41296	0.193561	2.85391e-11	CR44003	NO	NO
FBgn0029814	-1.39451	0.133642	5.06501e-23	CG15765	NO	NO
FBgn0040056	-1.34725	0.138498	5.69575e-20	CG17698	NO	NO
FBgn0004511	-1.34264	0.185925	4.94093e-11	dy	NO	NO
FBgn0030107	-1.34059	0.182305	1.99572e-11	CG15370	NO	NO
FBgn0003218	-1.27621	0.17556	3.50379e-11	rdgB	NO	YES
FBgn0012034	-1.2581	0.119592	2.19306e-23	AcCoAS	NO	NO
FBgn0032382	-1.25254	0.163046	1.91237e-12	Mal-B2	NO	NO
FBgn0033926	-1.24514	0.176981	1.74636e-10	Arc1	NO	NO
FBgn0039102	-1.24246	0.174195	9.08761e-11	SPE	NO	NO
FBgn0005626	-1.22435	0.175481	2.62564e-10	ple	NO	NO
FBgn0283427	-1.20516	0.117171	2.33784e-22	FASN1	NO	NO
FBgn0000346	-1.18116	0.132932	1.06993e-16	comt	NO	NO
FBgn0035977	-1.17625	0.193715	7.47148e-08	PGRP-LF	NO	NO
FBgn0266211	-1.14122	0.126108	2.64967e-17	CR44906	NO	NO
FBgn0052364	-1.12301	0.19206	2.65829e-07	tut	NO	NO
FBgn0021800	-1.10629	0.118815	2.53462e-18	Reph	NO	NO
FBgn0024366	-1.10013	0.143478	2.11484e-12	CG11409	NO	NO
FBgn0030581	-1.08035	0.188552	4.98216e-07	CG14408	YES	NO
FBgn0033051	-1.0697	0.173939	4.77047e-08	Strica	NO	NO
FBgn0036677	-1.043	0.13053	1.91681e-13	CG13023	NO	NO
FBgn0260932	-1.04052	0.191837	2.51595e-06	cuff	NO	NO
FBgn0086251	-1.03624	0.133277	9.85149e-13	del	NO	NO
FBgn0051098	-1.01147	0.189567	3.91096e-06	CG31098	NO	NO
FBgn0035578	-0.967752	0.193173	1.89939e-05	CG13707	NO	NO
FBgn0020379	-0.945266	0.113643	1.33798e-14	Rfx	NO	NO
FBgn0038662	-0.942197	0.147687	1.22779e-08	Mpc1	YES	NO
FBgn0035737	-0.94168	0.123485	2.78205e-12	Cpr65Ec	NO	NO
FBgn0040251	-0.931319	0.118417	4.90286e-13	Ugt86Di	NO	NO
FBgn0034733	-0.929387	0.187356	2.37955e-05	CG4752	NO	NO
FBgn0013812	-0.922496	0.193022	5.17453e-05	Dhc93AB	NO	NO
FBgn0051005	-0.918014	0.136339	1.34532e-09	qless	NO	NO
FBgn0031170	-0.917654	0.146905	2.64961e-08	CG1718	NO	NO
FBgn0038581	-0.917583	0.161835	6.89676e-07	CG14314	NO	NO
FBgn0264489	-0.914646	0.101859	4.73808e-17	CG43897	NO	NO
FBgn0003886	-0.913239	0.192286	5.94443e-05	alphaTub85E	NO	NO
FBgn0022160	-0.909078	0.186442	3.41964e-05	Gpo-1	NO	NO
FBgn0032449	-0.895317	0.171383	6.77769e-06	CG17036	NO	NO
FBgn0015558	-0.89402	0.187114	5.19122e-05	tty	NO	NO
FBgn0058006	-0.89277	0.158665	8.59712e-07	CG40006	NO	NO
FBgn0270926	-0.891627	0.121589	2.29968e-11	AsnS	NO	YES
FBgn0051216	-0.891278	0.16023	1.20892e-06	Naam	NO	NO
FBgn0043362	-0.889539	0.139756	1.32249e-08	bchs	YES	NO
FBgn0051140	-0.888819	0.185428	4.88485e-05	CG31140	NO	YES
FBgn0260874	-0.882658	0.0996896	1.39321e-16	Ir76a	NO	NO
FBgn0029895	-0.882555	0.157815	1.03855e-06	CG14441	NO	NO
FBgn0039238	-0.882244	0.177381	2.2408e-05	CG7016	NO	NO
FBgn0028408	-0.877444	0.193597	0.000146001	Drep2	NO	NO
FBgn0027611	-0.874627	0.0911538	1.83512e-19	LManII	NO	NO
FBgn0029526	-0.873928	0.17285	1.53193e-05	CR18166	NO	NO
FBgn0030839	-0.857731	0.159392	3.11688e-06	CG5613	YES	NO
FBgn0015571	-0.856326	0.143493	1.3638e-07	alpha-Est3	NO	NO
FBgn0004882	-0.850884	0.186813	0.000133039	orb	NO	NO
FBgn0034030	-0.816992	0.130743	2.62911e-08	CG8192	NO	NO
FBgn0031759	-0.814311	0.125147	5.73183e-09	kdm5/lid	YES	YES
FBgn0031589	-0.813318	0.105498	1.60888e-12	CG3714	YES	NO
FBgn0037060	-0.811839	0.190395	0.000424683	CG10508	NO	NO
FBgn0038268	-0.807215	0.119592	1.23331e-09	CG3631	NO	NO
FBgn0267294	-0.806316	0.163056	2.52251e-05	CR45730	NO	NO
FBgn0051370	-0.795105	0.172369	0.00010711	CG31370	NO	NO
FBgn0051559	-0.792278	0.157185	1.63089e-05	CG31559	NO	NO
FBgn0085474	-0.789703	0.187308	0.000507002	CG34445	NO	NO
FBgn0036862	-0.788755	0.150384	6.10101e-06	Gbs-76A	NO	NO
FBgn0028855	-0.788589	0.138534	6.10851e-07	CG15282	NO	NO
FBgn0000479	-0.780111	0.137944	7.43314e-07	dnc	NO	NO
FBgn0051673	-0.769873	0.117991	5.25008e-09	CG31673	YES	NO
FBgn0036689	-0.76551	0.157563	3.69872e-05	CG7730	NO	NO
FBgn0034788	-0.763447	0.19277	0.00126862	CG13532	NO	NO
FBgn0029924	-0.758572	0.142009	3.79995e-06	CG4586	NO	NO
FBgn0053329	-0.755654	0.187689	0.00101455	Sp212	NO	NO
FBgn0052249	-0.754993	0.187803	0.00103658	CG32249	NO	NO
FBgn0037050	-0.752302	0.193633	0.00165893	CG10566	NO	NO
FBgn0034391	-0.747782	0.160048	8.29513e-05	CG15080	NO	NO
FBgn0261285	-0.747582	0.130579	5.09232e-07	Ppcs	NO	NO
FBgn0004057	-0.747306	0.150735	2.40541e-05	Zw	NO	NO
FBgn0037076	-0.744965	0.154929	4.56528e-05	ebd2	NO	NO
FBgn0050343	-0.74385	0.186942	0.00120129	CG30343	NO	NO
FBgn0034270	-0.742775	0.173412	0.000397414	CG6401	YES	NO
FBgn0003890	-0.740649	0.168307	0.000249617	betaTub97EF	NO	NO
FBgn0029835	-0.739869	0.158017	8.01983e-05	CG5921	NO	NO
FBgn0052133	-0.734593	0.109066	1.33863e-09	ptip	YES	YES
FBgn0030407	-0.732145	0.158786	0.000107492	CG2543	YES	NO
FBgn0038672	-0.730349	0.148364	2.80859e-05	CG6005	YES	NO
FBgn0050195	-0.729374	0.190512	0.00201864	CG30195	NO	NO
FBgn0085417	-0.728869	0.136126	3.55883e-06	natalisin	NO	NO
FBgn0030218	-0.726381	0.148757	3.32134e-05	CG1628	NO	YES
FBgn0038017	-0.726307	0.156443	9.46525e-05	CG4115	NO	NO
FBgn0031998	-0.725685	0.187166	0.0017082	SLC5A11	NO	NO
FBgn0039494	-0.725629	0.175682	0.000699886	grass	NO	NO
FBgn0050154	-0.725343	0.190586	0.00215528	CG30154	NO	NO
FBgn0040928	-0.716413	0.171152	0.000567646	CR15345	NO	NO
FBgn0028499	-0.715969	0.095577	7.65589e-12	CG7985	NO	NO
FBgn0039641	-0.715375	0.167434	0.000411371	CG14511	NO	NO
FBgn0036927	-0.713902	0.191991	0.00284978	CG7433	NO	NO
FBgn0030347	-0.713878	0.182431	0.00151737	CG15739	NO	NO
FBgn0031632	-0.711804	0.130202	2.01355e-06	CG15628	NO	NO
FBgn0029504	-0.709337	0.135967	6.98451e-06	CHES-1-like	NO	NO
FBgn0034117	-0.708979	0.185629	0.00207136	CG7997	NO	NO
FBgn0000581	-0.708484	0.116808	7.74272e-08	E(Pc)	YES	YES
FBgn0036147	-0.70585	0.0785753	4.67352e-17	Plod	NO	NO
FBgn0035510	-0.705471	0.145604	3.94207e-05	Cpr64Aa	NO	NO
FBgn0051793	-0.704892	0.12175	3.60726e-07	CG31793	NO	NO
FBgn0052447	-0.704727	0.0941419	7.8091e-12	CG32447	NO	NO
FBgn0037913	-0.70024	0.118617	1.97142e-07	fabp	NO	NO
FBgn0045064	-0.698543	0.14428	3.98718e-05	bwa	NO	NO
FBgn0264822	-0.694661	0.167915	0.000681552	CR44030	NO	NO
FBgn0039859	-0.690011	0.187243	0.00314682	CG11539	YES	NO
FBgn0262562	-0.688115	0.181148	0.00220469	CG43102	NO	NO
FBgn0036942	-0.687769	0.190351	0.00393154	CG7328	NO	NO
FBgn0053276	-0.685925	0.149989	0.000124186	CG33276	NO	NO
FBgn0037696	-0.683745	0.130263	5.99784e-06	GstZ1	NO	NO
FBgn0037999	-0.68366	0.108161	1.72462e-08	CG4860	NO	YES
FBgn0030600	-0.681387	0.188736	0.00395929	hiw	NO	NO
FBgn0011762	-0.679764	0.114174	1.46762e-07	DNApol-alpha50	YES	NO
FBgn0003495	-0.677382	0.160393	0.000492561	spz	NO	NO
FBgn0033467	-0.676147	0.187907	0.00407233	CG15863	NO	NO
FBgn0028746	-0.67607	0.191211	0.0049631	CG18508	NO	NO
FBgn0264744	-0.673836	0.140683	4.95704e-05	CG44002	NO	NO
FBgn0039294	-0.673076	0.163137	0.000707937	Cad96Cb	NO	NO
FBgn0260005	-0.672451	0.172731	0.00161438	wtrw	NO	NO
FBgn0031741	-0.671212	0.156618	0.000395013	CG11034	NO	NO
FBgn0036529	-0.670896	0.191742	0.0055427	pgant8	NO	NO
FBgn0000108	-0.669884	0.175422	0.00207295	Appl	NO	NO
FBgn0015572	-0.667467	0.19264	0.00614073	alpha-Est4	NO	NO
FBgn0032805	-0.666772	0.152273	0.00027192	CG10337	NO	NO
FBgn0038725	-0.664929	0.190838	0.00577597	CG6184	NO	NO
FBgn0031384	-0.663679	0.122644	2.67434e-06	CG4238	YES	NO
FBgn0038893	-0.66313	0.140814	7.08923e-05	CG6353	YES	NO
FBgn0028380	-0.662151	0.145131	0.000129641	fal	YES	NO
FBgn0036007	-0.660957	0.146279	0.00015507	path	NO	NO
FBgn0038179	-0.658362	0.15075	0.000284616	CG9312	NO	NO
FBgn0033367	-0.657083	0.191248	0.00669823	PPO2	NO	NO
FBgn0261617	-0.653555	0.129091	1.49006e-05	nej	NO	NO
FBgn0085260	-0.652615	0.170361	0.00200334	CG34231	NO	NO
FBgn0259832	-0.651805	0.191352	0.00729829	CG34229	NO	NO
FBgn0030968	-0.651111	0.163246	0.00115637	CG7322	NO	NO
FBgn0283437	-0.64696	0.193256	0.00867429	PPO1	NO	NO
FBgn0032447	-0.645525	0.185886	0.00599341	PICK1	NO	NO
FBgn0037099	-0.639251	0.109132	2.51051e-07	CG7173	NO	NO
FBgn0051713	-0.638593	0.159417	0.00108919	Apf	YES	NO
FBgn0037661	-0.637407	0.137884	0.000102969	Ada	NO	NO
FBgn0030932	-0.635454	0.173114	0.00328901	Ggt-1	NO	NO
FBgn0259818	-0.635209	0.149489	0.00044663	CG42399	NO	NO
FBgn0264907	-0.634886	0.186903	0.00746652	CG44098	NO	NO
FBgn0259222	-0.622848	0.193562	0.0123023	CG42322	NO	NO
FBgn0039883	-0.619543	0.188104	0.0101163	RhoGAP100F	NO	NO
FBgn0035231	-0.618875	0.176594	0.0054695	Cct2	NO	NO
FBgn0031574	-0.6164	0.0856292	5.78746e-11	CG3964	NO	NO
FBgn0265194	-0.615626	0.121647	1.49978e-05	Trpm	NO	NO
FBgn0015569	-0.615412	0.167901	0.00334672	alpha-Est10	NO	NO
FBgn0035501	-0.614906	0.146466	0.000540756	CG1299	NO	YES
FBgn0051103	-0.614552	0.192589	0.0131313	CG31103	NO	NO
FBgn0027621	-0.613198	0.108537	7.64114e-07	Pfrx	YES	NO
FBgn0003189	-0.608596	0.0893144	7.97007e-10	r	NO	NO
FBgn0038462	-0.607598	0.116385	6.8784e-06	CG17556	YES	NO
FBgn0022710	-0.606404	0.151179	0.00107107	Ac13E	NO	NO
FBgn0015011	-0.60583	0.192784	0.0148834	Ahcy89E	NO	NO
FBgn0261797	-0.605716	0.127775	6.17241e-05	Dhc64C	YES	NO
FBgn0040290	-0.600523	0.14144	0.000452483	RecQ4	NO	NO
FBgn0004865	-0.598255	0.143602	0.000610118	Eip78C	NO	YES
FBgn0032047	-0.595596	0.160277	0.00287216	CG13088	NO	NO
FBgn0042094	-0.594873	0.114805	8.38182e-06	Adk3	NO	NO
FBgn0043783	-0.594504	0.193365	0.017667	CG32444	NO	NO
FBgn0000084	-0.592365	0.127144	8.82009e-05	AnxB10	NO	NO
FBgn0039094	-0.59133	0.193102	0.0182119	CG10184	NO	NO
FBgn0010383	-0.590235	0.193133	0.0184931	Cyp18a1	NO	NO
FBgn0038608	-0.588423	0.083499	1.63752e-10	WRNexo	NO	NO
FBgn0266260	-0.588055	0.185548	0.0138202	CR44955	NO	NO
FBgn0000422	-0.587693	0.148159	0.00124932	Ddc	NO	NO
FBgn0259234	-0.585638	0.12265	5.25561e-05	Camta	YES	NO
FBgn0027348	-0.585529	0.19345	0.020034	bgm	NO	NO
FBgn0050022	-0.584306	0.120772	4.04471e-05	CG30022	NO	NO
FBgn0261526	-0.583837	0.121127	4.34297e-05	NT1	NO	NO
FBgn0261260	-0.582481	0.133904	0.000305036	mgl	NO	NO
FBgn0085520	-0.580699	0.146024	0.00120636	CR40801	NO	NO
FBgn0261625	-0.576871	0.188516	0.0183302	GLS	NO	NO
FBgn0037017	-0.576369	0.148466	0.00167681	CG4074	NO	NO
FBgn0041706	-0.575877	0.193712	0.0225725	CG3253	NO	NO
FBgn0021750	-0.574514	0.0934076	4.77047e-08	Aats-ser	NO	NO
FBgn0014417	-0.570848	0.15056	0.0022546	CG13397	NO	NO
FBgn0036684	-0.570609	0.132598	0.000367402	CG3764	NO	NO
FBgn0030676	-0.569617	0.191545	0.0225381	CG12379	YES	NO
FBgn0016031	-0.568759	0.145478	0.00153162	lama	NO	NO
FBgn0027287	-0.568543	0.0901083	1.84142e-08	Gmap	YES	YES
FBgn0051875	-0.566836	0.172981	0.0105304	CG31875	NO	NO
FBgn0037912	-0.566013	0.165992	0.00723756	sea	NO	NO
FBgn0266709	-0.563215	0.190924	0.023869	Zmynd10	NO	NO
FBgn0261859	-0.562797	0.122999	0.000123757	CG42788	NO	NO
FBgn0031244	-0.562056	0.122887	0.000124186	CG11601	NO	NO
FBgn0031735	-0.561295	0.187778	0.0217741	CG11029	NO	NO
FBgn0038727	-0.561215	0.173476	0.0117912	CG7432	NO	NO
FBgn0020306	-0.560942	0.10091	1.22271e-06	dom	NO	NO
FBgn0035056	-0.55944	0.0940609	1.51477e-07	spz6	NO	NO
FBgn0027654	-0.558553	0.187948	0.0226278	jdp	NO	NO
FBgn0026718	-0.555391	0.174985	0.0136868	fu12	NO	NO
FBgn0039419	-0.554415	0.188327	0.024167	CG12290	NO	NO
FBgn0051436	-0.549746	0.182535	0.0206698	CG31436	NO	NO
FBgn0259170	-0.546405	0.0881205	3.52749e-08	alpha-Man-Ia	NO	YES
FBgn0263930	-0.546229	0.0872647	2.49002e-08	dally	NO	NO
FBgn0041342	-0.545886	0.110258	2.48132e-05	Cct1	YES	NO
FBgn0034365	-0.545009	0.173426	0.0148834	CG5335	NO	NO
FBgn0051451	-0.542691	0.193445	0.0334911	CR31451	NO	NO
FBgn0003162	-0.542319	0.18546	0.0253305	Pu	NO	NO
FBgn0052549	-0.541103	0.138722	0.00157844	CG32549	NO	NO
FBgn0032817	-0.540931	0.123533	0.00027192	CG10631	YES	NO
FBgn0261954	-0.540395	0.117692	0.000116268	east	YES	YES
FBgn0264272	-0.540341	0.169802	0.0134853	mwh	NO	NO
FBgn0263384	-0.540286	0.192415	0.0333008	CR43436	NO	NO
FBgn0035508	-0.539823	0.193168	0.0341734	CG15005	NO	NO
FBgn0039244	-0.539413	0.0751013	6.37879e-11	CG11069	NO	NO
FBgn0035348	-0.53915	0.189015	0.0300487	CG16758	NO	NO
FBgn0051320	-0.539004	0.0970655	1.25839e-06	HEATR2	NO	NO
FBgn0036294	-0.538578	0.193156	0.034671	CG10654	NO	NO
FBgn0261445	-0.538216	0.0972219	1.38043e-06	sgl	YES	NO
FBgn0020389	-0.537171	0.0954	8.44332e-07	Papss	NO	NO
FBgn0266369	-0.534335	0.10079	4.59964e-06	Mtp	NO	NO
FBgn0033574	-0.533722	0.160917	0.00945895	Spn47C	NO	NO
FBgn0000109	-0.533567	0.177037	0.0205871	Aprt	NO	NO
FBgn0031001	-0.533222	0.165578	0.0122056	CG7884	NO	YES
FBgn0004034	-0.533144	0.18534	0.0284442	y	NO	NO
FBgn0036423	-0.530937	0.17071	0.0161418	CG3919	NO	NO
FBgn0041712	-0.53036	0.165646	0.0127254	yellow-d	NO	NO
FBgn0266557	-0.528953	0.132021	0.00108919	kis	YES	YES
FBgn0036398	-0.528798	0.120507	0.000262436	upSET	YES	NO
FBgn0264326	-0.528779	0.119262	0.000220065	DNApol-epsilon255	NO	NO
FBgn0034974	-0.528376	0.0904275	2.68812e-07	CG16786	NO	NO
FBgn0265523	-0.528002	0.115436	0.000124186	Smr	NO	NO
FBgn0038957	-0.527517	0.176252	0.0215974	CG7059	NO	NO
FBgn0036676	-0.525891	0.183892	0.0295716	CG13028	NO	NO
FBgn0031419	-0.52385	0.1937	0.0422184	CG15390	NO	NO
FBgn0033132	-0.523125	0.193665	0.0425226	Tsp42Ej	NO	NO
FBgn0003480	-0.521851	0.179847	0.0268082	spn-B	NO	NO
FBgn0036138	-0.521687	0.177431	0.024358	CG14143	NO	NO
FBgn0031940	-0.521616	0.164109	0.0135527	CG7214	NO	NO
FBgn0039650	-0.521284	0.178144	0.0252432	Mesh1	NO	YES
FBgn0261393	-0.520223	0.189761	0.0388642	alpha-Est5	NO	NO
FBgn0013984	-0.51966	0.130251	0.00115292	InR	NO	YES
FBgn0028331	-0.519363	0.0901148	4.12736e-07	l(1)G0289	YES	NO
FBgn0261244	-0.517447	0.0810356	1.20656e-08	inaE	NO	NO
FBgn0259734	-0.516493	0.143781	0.00414114	CG42388	NO	NO
FBgn0039759	-0.516024	0.193009	0.0451151	CG9733	NO	NO
FBgn0016694	-0.514633	0.138585	0.0028928	Pdp1	NO	NO
FBgn0003475	-0.513874	0.133342	0.00184863	spir	NO	NO
FBgn0260634	-0.513676	0.115924	0.000221057	eIF4G2	NO	NO
FBgn0037890	-0.513576	0.141475	0.00373465	CG17734	YES	NO
FBgn0013263	-0.512912	0.104523	2.98782e-05	Trl	YES	YES
FBgn0035113	-0.511892	0.193208	0.0475374	pyx	NO	NO
FBgn0030170	-0.511829	0.111859	0.000123757	CG2990	NO	NO
FBgn0030028	-0.511598	0.192415	0.0465235	Corp	NO	NO
FBgn0004656	-0.50992	0.114676	0.00020918	fs(1)h	NO	NO
FBgn0024836	-0.509533	0.130724	0.00159143	stan	NO	NO
FBgn0050085	-0.509157	0.0777052	4.43947e-09	Rif1	NO	NO
FBgn0037809	-0.508679	0.164257	0.0166534	CG12818	YES	NO
FBgn0036004	-0.507836	0.10858	8.17478e-05	Jarid2	YES	NO
FBgn0023180	-0.507796	0.13305	0.00208388	Orc6	NO	NO
FBgn0031494	-0.507612	0.141994	0.00437296	CG17219	YES	NO
FBgn0033636	-0.506596	0.123772	0.000790379	tou	NO	YES
FBgn0262962	-0.506202	0.188083	0.0434511	CG43273	NO	NO
FBgn0035375	-0.505158	0.114465	0.00023958	pgant6	NO	NO
FBgn0010328	-0.504148	0.0833841	8.61977e-08	woc	YES	YES
FBgn0038721	-0.503476	0.134336	0.00262204	subdued	NO	NO
FBgn0000497	-0.502652	0.129223	0.00163339	ds	NO	NO
FBgn0051373	-0.50196	0.185639	0.0422513	CG31373	NO	NO
FBgn0030586	-0.501437	0.190107	0.0485518	CG12539	NO	NO
FBgn0015376	-0.499367	0.0977127	1.18065e-05	cutlet	NO	NO
FBgn0004647	-0.49797	0.117098	0.000441893	N	NO	YES
FBgn0003301	-0.496636	0.122586	0.000925174	rut	NO	YES
FBgn0002719	-0.49639	0.143777	0.00638956	Men	NO	NO
FBgn0053196	-0.496362	0.145784	0.00733085	dpy	NO	NO
FBgn0001253	-0.494983	0.137819	0.00414608	ImpE1	NO	NO
FBgn0264746	-0.489316	0.185131	0.0480476	CG44004	NO	NO
FBgn0001257	-0.488075	0.0962553	1.43498e-05	ImpL2	NO	NO
FBgn0011785	-0.487772	0.106972	0.000130918	BRWD3	YES	NO
FBgn0002868	-0.487496	0.172813	0.0323458	MtnA	NO	NO
FBgn0038816	-0.487213	0.112201	0.000314401	Lrrk	YES	NO
FBgn0037960	-0.484246	0.0943605	1.06699e-05	mthl5	NO	NO
FBgn0033661	-0.483613	0.131969	0.00334672	CG13185	NO	NO
FBgn0016715	-0.483087	0.179889	0.0440838	Reg-2	NO	NO
FBgn0001078	-0.482747	0.178965	0.0429478	ftz-f1	NO	NO
FBgn0032779	-0.48218	0.169499	0.030619	CG16771	NO	NO
FBgn0036486	-0.481277	0.0836024	4.26949e-07	Msh6	NO	NO
FBgn0001112	-0.479465	0.114922	0.000596686	Gld	NO	NO
FBgn0034248	-0.479256	0.145006	0.0097646	CG14483	YES	NO
FBgn0263005	-0.477466	0.123701	0.00180967	CG43313	NO	NO
FBgn0034570	-0.477384	0.111555	0.000400877	CG10543	NO	NO
FBgn0002526	-0.476994	0.124694	0.00204164	LanA	NO	NO
FBgn0261549	-0.47686	0.143595	0.00938241	rdgA	NO	YES
FBgn0066365	-0.476471	0.17808	0.0449954	dyl	NO	NO
FBgn0086365	-0.475314	0.14	0.00750674	Orct2	NO	NO
FBgn0030251	-0.4747	0.0968081	3.03374e-05	CG2145	NO	NO
FBgn0039633	-0.471782	0.119107	0.00126771	CG11873	YES	YES
FBgn0034965	-0.471383	0.121669	0.00172588	ppk29	NO	NO
FBgn0052251	-0.470767	0.109235	0.000359482	Claspin	NO	NO
FBgn0051809	-0.470743	0.169044	0.0349108	CG31809	NO	NO
FBgn0035298	-0.46923	0.0909196	9.24884e-06	SCOT	YES	NO
FBgn0035545	-0.4686	0.153277	0.0184452	CG12607	NO	NO
FBgn0038118	-0.467048	0.135949	0.00669823	timeout	NO	NO
FBgn0034951	-0.466404	0.145172	0.0123817	CG3860	NO	NO
FBgn0033246	-0.465826	0.0982628	6.17241e-05	ACC	NO	YES
FBgn0086899	-0.465238	0.101773	0.000124602	tlk	NO	YES
FBgn0082585	-0.463058	0.174111	0.0465117	sprt	NO	NO
FBgn0030505	-0.462699	0.113493	0.000835617	NFAT	YES	NO
FBgn0004369	-0.461745	0.108972	0.000466891	Ptp99A	NO	NO
FBgn0005624	-0.461163	0.111806	0.000710038	Psc	NO	YES
FBgn0041092	-0.461059	0.095641	4.34197e-05	tai	NO	NO
FBgn0026577	-0.46087	0.121062	0.00214969	CG8677	YES	YES
FBgn0052475	-0.459572	0.141493	0.0113439	mthl8	NO	NO
FBgn0034098	-0.45885	0.155615	0.0239145	krimp	NO	NO
FBgn0262127	-0.458539	0.0948032	4.04716e-05	kibra	NO	NO
FBgn0030054	-0.458034	0.0862843	4.46576e-06	Caf1-180	YES	NO
FBgn0030511	-0.457755	0.170838	0.0446519	CG11158	NO	NO
FBgn0004655	-0.457355	0.11163	0.000780874	wapl	YES	YES
FBgn0010549	-0.457275	0.109883	0.000621131	l(2)03659	NO	NO
FBgn0030668	-0.455772	0.152748	0.022042	CG8128	YES	NO
FBgn0004860	-0.455621	0.092796	2.95648e-05	ph-d	NO	NO
FBgn0030674	-0.455247	0.130894	0.00589063	CG8184	YES	NO
FBgn0260388	-0.454467	0.111861	0.000884242	CG42514	NO	NO
FBgn0260003	-0.454163	0.122593	0.00295984	Dys	NO	NO
FBgn0039323	-0.453833	0.167178	0.0412603	CG10559	NO	NO
FBgn0022764	-0.452341	0.107946	0.000557431	Sin3A	NO	NO
FBgn0010382	-0.451277	0.0811611	1.21862e-06	CycE	NO	YES
FBgn0023094	-0.44901	0.073388	5.66891e-08	cyc	YES	NO
FBgn0035424	-0.447706	0.11879	0.00243191	CG11505	YES	YES
FBgn0034093	-0.445343	0.117607	0.00228366	CG15706	NO	NO
FBgn0034693	-0.443786	0.139566	0.0135189	CG11073	NO	NO
FBgn0039714	-0.443401	0.135798	0.0108259	Zip99C	YES	NO
FBgn0035429	-0.44292	0.168611	0.0498688	CG12017	NO	NO
FBgn0038461	-0.442895	0.123087	0.00407233	CG3678	YES	NO
FBgn0015609	-0.441684	0.151373	0.0257296	CadN	NO	NO
FBgn0039879	-0.441644	0.136209	0.0115342	Ir100a	NO	NO
FBgn0004167	-0.441414	0.125808	0.0054128	kst	NO	NO
FBgn0001075	-0.440896	0.135261	0.0109707	ft	NO	NO
FBgn0050196	-0.440683	0.164757	0.0449967	CG30196	NO	NO
FBgn0261671	-0.440345	0.132797	0.00947678	tweek	YES	NO
FBgn0031961	-0.440202	0.073027	9.52854e-08	CG7102	YES	NO
FBgn0265798	-0.438481	0.164649	0.046108	CR44587	NO	NO
FBgn0035415	-0.437696	0.15645	0.0340485	CG14966	YES	NO
FBgn0020386	-0.437675	0.102948	0.000443246	Pdk1	NO	YES
FBgn0051072	-0.436023	0.116701	0.00270832	Lerp	YES	NO
FBgn0028544	-0.43588	0.137344	0.0136868	CG16884	NO	NO
FBgn0263705	-0.435047	0.104857	0.000649351	Myo10A	NO	NO
FBgn0033538	-0.434197	0.10235	0.000458578	CG11883	NO	NO
FBgn0031294	-0.433712	0.160052	0.0416772	IA-2	NO	NO
FBgn0261934	-0.433252	0.131379	0.0100022	dikar	YES	YES
FBgn0003048	-0.43166	0.126384	0.00711087	pcx	YES	NO
FBgn0037105	-0.431091	0.0978428	0.0002447	S1P	NO	NO
FBgn0035805	-0.430877	0.116443	0.00299933	CG7506	YES	NO
FBgn0041111	-0.430341	0.107282	0.00107107	lilli	YES	NO
FBgn0032538	-0.429801	0.13848	0.016424	CG16885	NO	NO
FBgn0261885	-0.428201	0.115095	0.00284026	osa	YES	YES
FBgn0033730	-0.425734	0.124221	0.006847	Cpr49Ag	NO	NO
FBgn0053087	-0.424586	0.128946	0.0101261	LRP1	NO	NO
FBgn0028487	-0.424221	0.145134	0.025365	f-cup	NO	NO
FBgn0035497	-0.423824	0.100833	0.00053021	CG14995	NO	NO
FBgn0039688	-0.423108	0.121006	0.00557768	Kul	NO	NO
FBgn0264953	-0.423063	0.106785	0.00126771	Piezo	NO	NO
FBgn0039257	-0.422956	0.129188	0.0106162	tnc	NO	NO
FBgn0035398	-0.422827	0.140939	0.0212569	Cht7	NO	NO
FBgn0086655	-0.422757	0.114982	0.00322003	jing	NO	NO
FBgn0033725	-0.421896	0.113663	0.0028987	Cpr49Ac	NO	NO
FBgn0032123	-0.421066	0.116234	0.00381752	Oatp30B	YES	NO
FBgn0262582	-0.420834	0.0995911	0.000488519	cic	NO	NO
FBgn0036193	-0.420391	0.139998	0.0211159	CG14135	NO	NO
FBgn0033592	-0.420286	0.137463	0.0184452	CG13215	NO	NO
FBgn0037753	-0.418406	0.121454	0.00653557	CG12947	NO	NO
FBgn0036851	-0.418268	0.15637	0.0449967	CG14082	NO	NO
FBgn0022768	-0.41824	0.13329	0.0150388	Pp2C1	YES	NO
FBgn0038341	-0.417742	0.155966	0.0447337	AdamTS-A	NO	NO
FBgn0052529	-0.416792	0.128009	0.0110748	Hers	NO	YES
FBgn0011230	-0.415547	0.126976	0.010621	poe	YES	NO
FBgn0035876	-0.415498	0.144293	0.0282776	Pex2	NO	NO
FBgn0261710	-0.414951	0.100816	0.000733152	nocte	YES	YES
FBgn0061200	-0.414542	0.108991	0.0021658	Nup153	YES	YES
FBgn0259722	-0.413703	0.135447	0.0185529	CG42376	NO	NO
FBgn0267002	-0.411967	0.114423	0.00405699	unc-104	NO	NO
FBgn0029688	-0.41102	0.099044	0.000648107	lva	YES	NO
FBgn0043884	-0.409493	0.122396	0.0087088	mask	YES	YES
FBgn0032189	-0.40927	0.139574	0.0248734	Ripalpha	NO	NO
FBgn0261383	-0.409012	0.137455	0.022444	IntS6	YES	NO
FBgn0035106	-0.408865	0.108958	0.00258218	rno	YES	YES
FBgn0023441	-0.408813	0.113563	0.00405965	fus	NO	NO
FBgn0017482	-0.408718	0.147312	0.0357967	T3dh	NO	NO
FBgn0027535	-0.407411	0.135298	0.0206807	botv	NO	NO
FBgn0003396	-0.407188	0.144567	0.0326445	shn	NO	YES
FBgn0087008	-0.405702	0.111012	0.00344708	e(y)3	YES	YES
FBgn0033889	-0.405442	0.107566	0.00243191	CG6701	NO	NO
FBgn0031069	-0.404782	0.0968268	0.000578733	Pmp70	YES	NO
FBgn0026616	-0.404322	0.104393	0.00173024	alpha-Man-IIb	NO	YES
FBgn0000382	-0.403848	0.0853163	6.36888e-05	csw	YES	YES
FBgn0020309	-0.403182	0.0969389	0.000626271	crol	YES	YES
FBgn0261554	-0.40255	0.091817	0.000266452	CG42672	YES	NO
FBgn0038233	-0.402489	0.116122	0.00612771	HtrA2	YES	NO
FBgn0261552	-0.402134	0.123015	0.0106908	ps	NO	NO
FBgn0039054	-0.401456	0.15008	0.0449967	Cow	NO	NO
FBgn0031698	-0.401427	0.101707	0.00133758	Ncoa6	YES	YES
FBgn0035254	-0.400573	0.127753	0.015143	CG7974	NO	NO
FBgn0031879	-0.400516	0.133792	0.0215863	uif	NO	NO
FBgn0053181	-0.400507	0.124747	0.0124413	CG33181	NO	NO
FBgn0259685	-0.399507	0.12055	0.00949877	crb	NO	NO
FBgn0010768	-0.399157	0.114247	0.00562382	sqz	NO	NO
FBgn0033194	-0.399038	0.108242	0.00313669	Vps13	NO	NO
FBgn0265630	-0.39901	0.0973977	0.000780874	sno	NO	NO
FBgn0261836	-0.398656	0.147251	0.0418798	Msp300	NO	NO
FBgn0085412	-0.398472	0.114323	0.00575645	CG34383	NO	NO
FBgn0262730	-0.398203	0.141266	0.0324672	CG14446	YES	NO
FBgn0267185	-0.397309	0.130717	0.0193768	CR45625	NO	NO
FBgn0031023	-0.397289	0.123919	0.0125822	CG14200	NO	NO
FBgn0259167	-0.397264	0.127497	0.015889	CG42272	NO	NO
FBgn0015591	-0.39665	0.141796	0.0340485	AstA	NO	NO
FBgn0002543	-0.396032	0.100863	0.00144619	robo2	NO	YES
FBgn0052479	-0.394945	0.106385	0.00289651	Usp10	YES	NO
FBgn0016977	-0.39476	0.126447	0.0156535	spen	NO	NO
FBgn0267348	-0.393635	0.0940651	0.000569239	LanB2	NO	NO
FBgn0052451	-0.393545	0.113118	0.00587455	SPoCk	NO	NO
FBgn0010113	-0.393251	0.105189	0.00269228	hdc	NO	YES
FBgn0260938	-0.393078	0.106786	0.00317766	tay	NO	NO
FBgn0036821	-0.392731	0.139213	0.0323458	CG3961	NO	NO
FBgn0003525	-0.392433	0.136311	0.0282776	stg	NO	YES
FBgn0039588	-0.391986	0.139015	0.0324206	CG12413	YES	NO
FBgn0029893	-0.391931	0.103525	0.00228791	CG14442	YES	NO
FBgn0010434	-0.391803	0.0896039	0.000278374	cora	NO	NO
FBgn0003996	-0.391696	0.138987	0.0325038	w	NO	YES
FBgn0052074	-0.39145	0.145189	0.0430315	CG32074	NO	NO
FBgn0039728	-0.391034	0.103198	0.00226498	CG7896	NO	YES
FBgn0038919	-0.390801	0.095975	0.000852035	CG17843	NO	NO
FBgn0260442	-0.390733	0.102886	0.00220562	rhea	NO	NO
FBgn0002643	-0.390274	0.0990396	0.00136828	mam	NO	YES
FBgn0003137	-0.389955	0.121276	0.012373	Ppn	NO	NO
FBgn0051523	-0.389915	0.101533	0.00194038	CG31523	NO	NO
FBgn0011259	-0.388796	0.131023	0.0228854	Sema-1a	NO	NO
FBgn0033033	-0.38682	0.141603	0.0396685	scaf	NO	NO
FBgn0005386	-0.386738	0.0972431	0.00120636	ash1	YES	NO
FBgn0050463	-0.386098	0.101883	0.00226435	CG30463	NO	NO
FBgn0032477	-0.386059	0.127178	0.0195931	CG5287	YES	NO
FBgn0259113	-0.38586	0.0902507	0.000407059	DNApol-alpha180	NO	NO
FBgn0000996	-0.385198	0.0944564	0.00083305	dup	NO	NO
FBgn0260794	-0.385131	0.113035	0.0072923	ctrip	NO	NO
FBgn0004197	-0.385049	0.108754	0.00487966	Ser	NO	YES
FBgn0035844	-0.385008	0.0805309	5.14846e-05	CG13676	NO	NO
FBgn0015269	-0.384936	0.108396	0.00472763	Nf1	YES	NO
FBgn0013469	-0.384359	0.108487	0.00485547	klu	NO	NO
FBgn0085446	-0.384243	0.114191	0.00825291	CG34417	NO	YES
FBgn0038735	-0.383927	0.112347	0.00707586	CG4662	YES	NO
FBgn0028956	-0.382732	0.076433	1.91554e-05	mthl3	NO	NO
FBgn0010575	-0.381851	0.105248	0.00375758	sbb	NO	NO
FBgn0260789	-0.381316	0.112681	0.0077705	mxc	YES	NO
FBgn0031981	-0.381238	0.127389	0.0215974	CG7466	YES	YES
FBgn0003862	-0.381176	0.131893	0.0275893	trx	YES	NO
FBgn0026059	-0.380851	0.0996634	0.00206077	Mhcl	NO	NO
FBgn0085430	-0.380624	0.126385	0.0206698	CG34401	NO	NO
FBgn0050183	-0.380364	0.119317	0.0132625	CG30183	YES	NO
FBgn0036678	-0.379933	0.113964	0.00901704	CG11905	NO	NO
FBgn0034734	-0.379801	0.108495	0.00553576	CG4554	NO	NO
FBgn0021764	-0.378817	0.116185	0.010949	sdk	NO	YES
FBgn0066101	-0.378552	0.121071	0.0154891	LpR1	NO	NO
FBgn0262519	-0.378274	0.0789975	4.97415e-05	Mi-2	NO	NO
FBgn0045842	-0.377981	0.131823	0.0290632	yuri	NO	YES
FBgn0036814	-0.377826	0.124926	0.0201383	CG14073	NO	NO
FBgn0266549	-0.377099	0.13357	0.0322302	CR45102	NO	NO
FBgn0283451	-0.376964	0.120132	0.0150388	br	NO	YES
FBgn0028540	-0.376491	0.116442	0.0118345	CG9008	NO	NO
FBgn0031820	-0.376291	0.118326	0.0135146	Daxx	NO	YES
FBgn0030183	-0.376081	0.099791	0.00243191	CG15309	YES	NO
FBgn0025631	-0.375989	0.133672	0.032943	moody	NO	NO
FBgn0021767	-0.375743	0.138441	0.041305	org-1	NO	NO
FBgn0004885	-0.375633	0.104033	0.00395821	tok	NO	NO
FBgn0015040	-0.375403	0.0881924	0.000436875	Cyp9c1	NO	NO
FBgn0024189	-0.374441	0.12078	0.0165157	sns	NO	YES
FBgn0023507	-0.373863	0.131402	0.0305991	CG3835	NO	NO
FBgn0263490	-0.373858	0.0999598	0.00268943	mld	NO	YES
FBgn0259247	-0.373692	0.119672	0.0156465	laccase2	NO	NO
FBgn0004370	-0.372545	0.103738	0.00414608	Ptp10D	NO	NO
FBgn0086676	-0.37107	0.0934273	0.00122739	spin	YES	NO
FBgn0265623	-0.37055	0.140688	0.0489481	Su(z)2	NO	YES
FBgn0264495	-0.370465	0.122677	0.0203533	gpp	NO	NO
FBgn0010825	-0.36852	0.111282	0.00957143	Gug	YES	NO
FBgn0263392	-0.36833	0.118061	0.0157382	Tet	NO	NO
FBgn0261570	-0.366633	0.119502	0.017961	CG42684	NO	NO
FBgn0039214	-0.365848	0.128896	0.0310817	puf	YES	NO
FBgn0030485	-0.365587	0.0747266	3.19104e-05	CG1998	NO	NO
FBgn0264975	-0.365533	0.0936289	0.00156436	Nrg	NO	NO
FBgn0026083	-0.365512	0.113737	0.0123815	tyf	NO	NO
FBgn0263110	-0.365287	0.105678	0.00630825	CG43367	YES	NO
FBgn0263968	-0.36461	0.105339	0.00620678	nonC	YES	NO
FBgn0038739	-0.364596	0.104465	0.00569309	CG4686	NO	NO
FBgn0010762	-0.364534	0.079257	0.000112319	simj	NO	NO
FBgn0004861	-0.364143	0.097869	0.00284026	ph-p	NO	NO
FBgn0264089	-0.363552	0.113273	0.0124737	sli	NO	NO
FBgn0260960	-0.363478	0.100915	0.00404244	Baldspot	NO	NO
FBgn0262735	-0.363362	0.121302	0.0214672	Imp	NO	NO
FBgn0031016	-0.36323	0.108874	0.00897817	kek5	NO	NO
FBgn0260660	-0.36261	0.10908	0.00928962	Mp	NO	NO
FBgn0003415	-0.361831	0.121567	0.0224049	skd	NO	YES
FBgn0029843	-0.361187	0.124946	0.0275639	Nep1	NO	NO
FBgn0013733	-0.360755	0.125703	0.0289208	shot	NO	NO
FBgn0037344	-0.360677	0.10007	0.00402997	CG2926	YES	YES
FBgn0037518	-0.360286	0.117653	0.0182119	CG2641	NO	NO
FBgn0030293	-0.360241	0.11228	0.0125033	CG1737	YES	NO
FBgn0037541	-0.360054	0.0938698	0.00197045	CG2747	NO	NO
FBgn0040496	-0.359993	0.128063	0.03306	CG17104	NO	NO
FBgn0052767	-0.359608	0.126752	0.0311782	CG32767	YES	YES
FBgn0259994	-0.359068	0.13584	0.0480476	CG42492	NO	NO
FBgn0025455	-0.357396	0.115667	0.0170059	CycT	YES	NO
FBgn0015929	-0.356612	0.0629158	6.93279e-07	dpa	YES	NO
FBgn0000017	-0.355176	0.109794	0.0117912	Abl	NO	NO
FBgn0015600	-0.354462	0.118864	0.0221011	toc	NO	NO
FBgn0020412	-0.354147	0.0852457	0.000637978	JIL-1	YES	YES
FBgn0002921	-0.353146	0.0846413	0.000596686	Atpalpha	NO	NO
FBgn0003423	-0.352546	0.0861617	0.00079329	slgA	NO	NO
FBgn0250754	-0.352148	0.112826	0.0156813	CG42232	YES	NO
FBgn0027279	-0.352091	0.100778	0.00562382	l(1)G0196	NO	NO
FBgn0261548	-0.351848	0.111657	0.0145464	CG42666	NO	NO
FBgn0266377	-0.351716	0.118139	0.0223692	Pde8	NO	NO
FBgn0028504	-0.350745	0.108871	0.0121637	CG12182	YES	NO
FBgn0041180	-0.350709	0.117553	0.022042	Tep4	NO	YES
FBgn0085436	-0.349251	0.110316	0.0139613	Not1	YES	YES
FBgn0000541	-0.348748	0.103175	0.00787208	E(bx)	YES	NO
FBgn0266019	-0.348728	0.118268	0.0239145	rudhira	NO	NO
FBgn0000287	-0.347306	0.103437	0.00840578	salr	NO	NO
FBgn0005631	-0.346214	0.104311	0.00942236	robo1	YES	NO
FBgn0026427	-0.344969	0.111758	0.0171091	Su(var)2-HP2	YES	NO
FBgn0031118	-0.344936	0.110887	0.0161283	RhoGAP19D	NO	NO
FBgn0033735	-0.344622	0.121331	0.0309084	CG8525	NO	NO
FBgn0263120	-0.344319	0.0799256	0.000361152	Acsl	YES	NO
FBgn0015279	-0.344044	0.0808949	0.000441893	Pi3K92E	YES	NO
FBgn0020251	-0.343593	0.109866	0.0154677	sfl	Yes	NO
FBgn0024732	-0.342305	0.119801	0.0297392	Drep1	NO	NO
FBgn0034184	-0.340865	0.114914	0.0229319	CG9646	YES	NO
FBgn0010473	-0.340822	0.10049	0.00758583	tutl	NO	NO
FBgn0036240	-0.339981	0.126255	0.0433415	CG6928	NO	NO
FBgn0032940	-0.3389	0.0762025	0.00020918	Mondo	YES	NO
FBgn0002431	-0.338032	0.112369	0.020832	hyd	YES	NO
FBgn0031107	-0.337898	0.128272	0.0489228	HERC2	YES	NO
FBgn0030466	-0.337097	0.109286	0.0172051	CG15744	YES	NO
FBgn0026239	-0.336792	0.126071	0.0452945	gukh	NO	NO
FBgn0038223	-0.336269	0.120878	0.0351925	Afti	YES	NO
FBgn0039006	-0.336228	0.107998	0.0160027	Cyp6d4	NO	NO
FBgn0035679	-0.335883	0.112584	0.022042	CG10467	YES	NO
FBgn0016081	-0.335244	0.11956	0.0335909	fry	NO	NO
FBgn0010051	-0.335125	0.118848	0.0324206	Itp-r83A	YES	NO
FBgn0039302	-0.334773	0.0938705	0.00448831	Nup358	YES	YES
FBgn0031990	-0.334666	0.0923684	0.003814	PAPLA1	YES	NO
FBgn0011659	-0.332497	0.117747	0.0321959	Mlh1	NO	NO
FBgn0004607	-0.332393	0.121454	0.0392353	zfh2	NO	NO
FBgn0265974	-0.332315	0.0953418	0.00575645	ttv	NO	NO
FBgn0027864	-0.332272	0.120108	0.0365751	Ogg1	NO	NO
FBgn0034657	-0.332204	0.093349	0.00460788	LBR	NO	YES
FBgn0016797	-0.331888	0.0865651	0.00198089	fz2	NO	NO
FBgn0029800	-0.331517	0.11013	0.0207294	lin-52	YES	NO
FBgn0001994	-0.331242	0.0708625	8.25505e-05	crp	NO	NO
FBgn0003175	-0.331104	0.118757	0.034671	px	NO	NO
FBgn0040752	-0.330197	0.0919946	0.00416559	Prosap	NO	NO
FBgn0032957	-0.329956	0.105025	0.0149112	CG2225	NO	NO
FBgn0259212	-0.329565	0.096935	0.00743776	cno	YES	YES
FBgn0039674	-0.329515	0.0971104	0.00755001	CG1907	NO	YES
FBgn0043903	-0.329464	0.100525	0.0105304	dome	YES	NO
FBgn0011653	-0.328688	0.0882129	0.00280685	mas	NO	YES
FBgn0259227	-0.328396	0.123949	0.0475374	CG42327	NO	NO
FBgn0035936	-0.328377	0.0842827	0.00159947	Tsp66E	NO	NO
FBgn0034878	-0.328152	0.0857996	0.0020427	pita	YES	YES
FBgn0036574	-0.328017	0.0722131	0.000139968	elg1	YES	NO
FBgn0027660	-0.327808	0.0988083	0.00944872	blot	NO	YES
FBgn0263289	-0.327753	0.112119	0.025365	scrib	YES	NO
FBgn0000119	-0.327303	0.106769	0.018063	arr	YES	YES
FBgn0031052	-0.326781	0.0884079	0.00303634	CG14215	YES	YES
FBgn0035617	-0.326776	0.117165	0.0346667	l(3)psg2	YES	YES
FBgn0013343	-0.325738	0.114576	0.0307063	Syx1A	NO	NO
FBgn0010808	-0.325709	0.0875057	0.00282976	l(3)03670	YES	NO
FBgn0036843	-0.325674	0.111865	0.0261518	CG6812	YES	NO
FBgn0025639	-0.325612	0.0804001	0.000929047	Hmt4-20	YES	NO
FBgn0000140	-0.325581	0.121831	0.0452247	asp	NO	NO
FBgn0039209	-0.324809	0.116067	0.0340034	CG13624	NO	NO
FBgn0004406	-0.324302	0.107805	0.020832	tam	NO	NO
FBgn0030266	-0.324234	0.120899	0.0444761	CG11122	YES	NO
FBgn0027556	-0.323718	0.0829688	0.0015743	CG4928	NO	NO
FBgn0085451	-0.323078	0.0818899	0.00134419	CG34422	YES	NO
FBgn0039159	-0.323048	0.118572	0.0403729	mRpS24	YES	NO
FBgn0261444	-0.322991	0.104131	0.0164713	CG3638	NO	NO
FBgn0262742	-0.322239	0.0742748	0.00031918	Fas1	NO	YES
FBgn0031359	-0.321468	0.0868797	0.00299933	Rim2	YES	NO
FBgn0261823	-0.32115	0.100101	0.0125033	Asx	YES	NO
FBgn0034500	-0.320798	0.087056	0.00314682	CG11200	NO	NO
FBgn0040305	-0.320786	0.118015	0.0409072	MTF-1	YES	YES
FBgn0027085	-0.319864	0.111512	0.0290336	Aats-leu	YES	NO
FBgn0000709	-0.319767	0.105887	0.0203533	fliI	YES	NO
FBgn0085437	-0.319058	0.0942549	0.00775069	CG34408	YES	NO
FBgn0024277	-0.318505	0.104409	0.0187558	trio	NO	NO
FBgn0026370	-0.318391	0.101974	0.0156503	SRPK	YES	NO
FBgn0004373	-0.318189	0.107298	0.0229525	fwd	NO	NO
FBgn0031738	-0.317904	0.110232	0.0280381	CG9171	NO	NO
FBgn0031895	-0.317787	0.113971	0.034671	CG4497	NO	NO
FBgn0005632	-0.317584	0.107396	0.0234516	faf	YES	NO
FBgn0000542	-0.316379	0.117497	0.0433415	ec	NO	NO
FBgn0031091	-0.316282	0.114349	0.036609	Phf7	NO	NO
FBgn0036732	-0.316215	0.0791823	0.00114081	Oatp74D	NO	NO
FBgn0028982	-0.315243	0.06992	0.000162003	Spt6	YES	NO
FBgn0259228	-0.314614	0.114141	0.0375354	C3G	NO	NO
FBgn0013756	-0.314498	0.0960777	0.0106162	Mtor	YES	NO
FBgn0000289	-0.313804	0.0762735	0.000737098	cg	YES	YES
FBgn0034643	-0.313703	0.106179	0.0235974	CG10321	YES	NO
FBgn0027500	-0.3126	0.0852986	0.00334672	spd-2	YES	NO
FBgn0017577	-0.312574	0.0869603	0.00411705	Mcm5	YES	YES
FBgn0260632	-0.312354	0.115207	0.0415808	dl	NO	NO
FBgn0028539	-0.312342	0.100215	0.0158606	CG31731	NO	NO
FBgn0033989	-0.311683	0.0952742	0.0106263	CG7639	YES	NO
FBgn0266083	-0.311193	0.0945876	0.0101812	ocm	NO	YES
FBgn0263600	-0.311182	0.0963056	0.011883	DNApol-delta	NO	NO
FBgn0031252	-0.310948	0.117135	0.0470479	CG13690	NO	NO
FBgn0023518	-0.310757	0.103671	0.0213794	trr	YES	NO
FBgn0003731	-0.310742	0.105885	0.0247172	Egfr	NO	NO
FBgn0001128	-0.310065	0.109736	0.0321238	Gpdh	YES	NO
FBgn0030286	-0.309778	0.0856223	0.00386843	CG1657	NO	NO
FBgn0020307	-0.308321	0.10546	0.0253585	dve	NO	YES
FBgn0027655	-0.308259	0.116715	0.0482672	htt	YES	NO
FBgn0001624	-0.308096	0.0964749	0.0130293	dlg1	NO	NO
FBgn0027930	-0.307856	0.0691882	0.000207638	MP1	NO	NO
FBgn0033890	-0.307397	0.076737	0.00108919	Ctf4	YES	NO
FBgn0005536	-0.306371	0.0947384	0.0118231	Mbs	NO	NO
FBgn0041164	-0.306137	0.071255	0.000378214	armi	NO	NO
FBgn0263102	-0.305913	0.0939531	0.0110748	psq	NO	YES
FBgn0263197	-0.30571	0.106634	0.0290632	Patronin	YES	NO
FBgn0036374	-0.305631	0.0990106	0.0171091	Spt20	YES	YES
FBgn0001404	-0.305456	0.113735	0.0440838	egh	NO	NO
FBgn0261283	-0.30511	0.0808722	0.00240568	SREBP	YES	YES
FBgn0036556	-0.305049	0.0869641	0.0054171	CG5830	YES	YES
FBgn0037153	-0.304995	0.0936795	0.0110748	olf413	NO	NO
FBgn0003651	-0.304983	0.106783	0.0297837	svp	NO	NO
FBgn0037109	-0.304917	0.0839885	0.00373465	MED1	YES	NO
FBgn0004875	-0.304806	0.0884924	0.00653557	enc	YES	NO
FBgn0039338	-0.304726	0.0762571	0.00113083	XNP	YES	YES
FBgn0263006	-0.304609	0.0959427	0.0136675	Ca-P60A	YES	NO
FBgn0000546	-0.303853	0.0845613	0.00412988	EcR	NO	YES
FBgn0260959	-0.303739	0.0693765	0.000272092	MCPH1	YES	NO
FBgn0260965	-0.303042	0.107501	0.0324672	CG42588	YES	NO
FBgn0263258	-0.300911	0.0976051	0.0172821	chas	NO	NO
FBgn0263108	-0.300307	0.0974276	0.0173006	BtbVII	YES	YES
FBgn0035574	-0.3003	0.106833	0.03306	RhoGEF64C	NO	NO
FBgn0259676	-0.299857	0.0953768	0.0148545	DNApol-alpha60	YES	YES
FBgn0265276	-0.299669	0.093236	0.0123815	l(3)neo38	NO	YES
FBgn0030486	-0.299567	0.102819	0.0260118	Set2	YES	NO
FBgn0051122	-0.299133	0.0951107	0.0148085	CG31122	YES	NO
FBgn0259211	-0.297876	0.094767	0.0148746	grh	NO	NO
FBgn0023407	-0.297864	0.100316	0.0227825	B4	NO	NO
FBgn0020633	-0.297512	0.108169	0.0379957	Mcm7	NO	NO
FBgn0035162	-0.297291	0.0773734	0.00193102	CG13900	NO	NO
FBgn0050011	-0.296115	0.0980036	0.0202838	gem	NO	NO
FBgn0020279	-0.296102	0.082635	0.00425201	lig	YES	YES
FBgn0266696	-0.295979	0.102722	0.0282475	CG45186	NO	NO
FBgn0015589	-0.293537	0.110336	0.0464248	Apc	YES	NO
FBgn0034240	-0.292749	0.111515	0.0499936	MESR4	YES	YES
FBgn0000409	-0.291626	0.099466	0.0248824	Cyt-c-p	NO	NO
FBgn0051522	-0.291459	0.0868843	0.00849044	CG31522	NO	NO
FBgn0259938	-0.290758	0.0964843	0.020593	cwo	NO	YES
FBgn0024555	-0.290718	0.0925434	0.0149112	flfl	YES	NO
FBgn0011763	-0.289827	0.0556516	7.30651e-06	Dp	YES	NO
FBgn0267390	-0.289704	0.105306	0.0379465	dop	YES	NO
FBgn0000414	-0.289354	0.10674	0.0416042	Dab	YES	NO
FBgn0024245	-0.28929	0.0860979	0.00837227	dnt	NO	NO
FBgn0259984	-0.287941	0.107574	0.0448798	kuz	NO	NO
FBgn0262527	-0.287574	0.100424	0.0292823	nsl1	YES	YES
FBgn0015278	-0.287377	0.104328	0.0376996	Pi3K68D	NO	NO
FBgn0041186	-0.286863	0.0928525	0.017015	Slbp	YES	NO
FBgn0028563	-0.284834	0.100513	0.0314778	sut1	NO	NO
FBgn0265082	-0.284126	0.0843498	0.00817677	Cdep	YES	YES
FBgn0085443	-0.284118	0.103682	0.0389526	spri	NO	NO
FBgn0037188	-0.283579	0.0892287	0.0135558	CG7369	YES	YES
FBgn0046225	-0.282921	0.0806344	0.0054128	CG17230	NO	NO
FBgn0032886	-0.282734	0.105556	0.0447337	CG9328	NO	YES
FBgn0028325	-0.282708	0.0933992	0.020034	l(1)G0334	YES	NO
FBgn0250788	-0.282478	0.10333	0.0395463	beta-Spec	YES	NO
FBgn0021760	-0.282345	0.089291	0.0140921	chb	YES	YES
FBgn0037702	-0.28208	0.0820474	0.00666292	CG8176	NO	NO
FBgn0039831	-0.281943	0.0963583	0.0252432	CG12054	YES	YES
FBgn0030812	-0.281183	0.0714802	0.00140545	CG8949	YES	NO
FBgn0003656	-0.281128	0.0910713	0.0171091	sws	YES	NO
FBgn0086694	-0.280463	0.0867889	0.0118827	Bre1	YES	NO
FBgn0033688	-0.280285	0.0918882	0.0187565	Prp8	YES	NO
FBgn0261243	-0.280239	0.0684657	0.000790379	Psa	YES	NO
FBgn0034400	-0.280201	0.0948529	0.0236093	CG15099	YES	NO
FBgn0003885	-0.28006	0.106076	0.0483398	alphaTub84D	YES	NO
FBgn0030628	-0.280054	0.0981834	0.0300487	CG9114	NO	NO
FBgn0033402	-0.279672	0.0835105	0.00864464	Myd88	YES	NO
FBgn0028579	-0.279419	0.0878444	0.0135146	phtf	YES	NO
FBgn0260936	-0.279143	0.102754	0.0410748	scny	YES	NO
FBgn0010583	-0.279112	0.0795333	0.0054128	dock	YES	NO
FBgn0001218	-0.278709	0.0767785	0.00373465	Hsc70-3	NO	NO
FBgn0028734	-0.27859	0.0908156	0.0179665	Fmr1	NO	YES
FBgn0004049	-0.278045	0.0922833	0.0206143	yrt	YES	NO
FBgn0037142	-0.276242	0.0953374	0.0270796	CG14562	NO	NO
FBgn0017418	-0.274838	0.0773984	0.00472763	ari-1	YES	NO
FBgn0260970	-0.274831	0.103625	0.0472709	Ubr3	YES	NO
FBgn0037743	-0.274517	0.0988335	0.0355909	CG8412	NO	NO
FBgn0015623	-0.274434	0.0784724	0.00557194	Cpr	YES	YES
FBgn0038533	-0.273634	0.0822248	0.00918091	CG7523	YES	YES
FBgn0028974	-0.273382	0.0957117	0.0297837	xmas-2	NO	NO
FBgn0051092	-0.273268	0.0947036	0.0279215	LpR2	NO	YES
FBgn0039537	-0.273101	0.0735646	0.00289651	CG5590	NO	YES
FBgn0263144	-0.273021	0.0867622	0.0147524	bin3	NO	NO
FBgn0031374	-0.272692	0.0874774	0.0158445	CG7337	NO	NO
FBgn0024291	-0.27226	0.0913968	0.0222781	Sir2	YES	NO
FBgn0000562	-0.272076	0.0811585	0.00854711	egl	YES	NO
FBgn0034420	-0.271713	0.101697	0.0452767	CG10737	NO	NO
FBgn0028484	-0.271461	0.0804013	0.00797322	Ack	YES	YES
FBgn0260941	-0.271241	0.0951343	0.0301389	app	NO	NO
FBgn0010877	-0.270739	0.0763422	0.00479787	l(3)05822	YES	YES
FBgn0002466	-0.270551	0.0757377	0.00440593	sti	NO	YES
FBgn0262733	-0.270179	0.0772046	0.00554155	Src64B	NO	NO
FBgn0261800	-0.27004	0.0922225	0.0251275	LanB1	NO	NO
FBgn0032363	-0.269869	0.101254	0.0458735	CG6509	YES	YES
FBgn0034598	-0.269744	0.0874483	0.0172051	CG4266	YES	NO
FBgn0027602	-0.269194	0.0824563	0.0108321	CG8611	YES	NO
FBgn0052654	-0.269186	0.0961195	0.0338556	Sec16	YES	NO
FBgn0000524	-0.268408	0.0858051	0.0154504	dx	YES	NO
FBgn0039668	-0.268336	0.0795649	0.00806462	Trc8	YES	YES
FBgn0037031	-0.26787	0.0999383	0.0445621	CG11456	NO	NO
FBgn0030360	-0.267578	0.101384	0.0484128	CG1806	NO	NO
FBgn0025815	-0.267319	0.0730082	0.00338047	Mcm6	YES	NO
FBgn0015221	-0.266828	0.0777779	0.00678591	Fer2LCH	NO	NO
FBgn0031051	-0.266694	0.0943395	0.0320432	Ranbp21	YES	NO
FBgn0003748	-0.265805	0.100172	0.0471167	Treh	NO	NO
FBgn0020647	-0.265755	0.092662	0.0290505	KrT95D	NO	NO
FBgn0267488	-0.26575	0.0934686	0.0307063	Mcr	NO	NO
FBgn0262103	-0.264145	0.0964155	0.0389996	Sik3	NO	NO
FBgn0083167	-0.263619	0.0912366	0.0275991	Neb-cGP	YES	NO
FBgn0008646	-0.263617	0.0886273	0.02251	E5	NO	NO
FBgn0002044	-0.263494	0.0688994	0.0020427	swm	YES	NO
FBgn0028646	-0.263358	0.0704226	0.00268943	aralar1	NO	NO
FBgn0262714	-0.262822	0.0803417	0.0106263	Sap130	YES	NO
FBgn0039120	-0.262428	0.0791747	0.00949877	Nup98-96	YES	YES
FBgn0002525	-0.262309	0.0669301	0.00148791	Lam	YES	NO
FBgn0015778	-0.262114	0.0928489	0.0322302	rin	NO	NO
FBgn0015622	-0.261905	0.0885657	0.0234516	Cnx99A	YES	NO
FBgn0013765	-0.26175	0.0811559	0.0120475	cnn	NO	NO
FBgn0023083	-0.260611	0.0856554	0.0192117	fray	NO	NO
FBgn0031420	-0.260549	0.0823164	0.0139816	Atxn7	YES	YES
FBgn0000163	-0.260514	0.088698	0.0245673	baz	NO	NO
FBgn0261588	-0.25972	0.0796249	0.0109203	pdm3	NO	NO
FBgn0042085	-0.259654	0.0846328	0.017961	Bap170	YES	YES
FBgn0033846	-0.25953	0.084398	0.0176499	mip120	YES	NO
FBgn0036317	-0.259521	0.0977962	0.0471167	CG10948	YES	NO
FBgn0038872	-0.257698	0.0811965	0.0136868	Nelf-A	YES	NO
FBgn0026533	-0.256902	0.0577788	0.00020918	Dek	YES	NO
FBgn0003090	-0.256826	0.0935129	0.0383329	pk	NO	NO
FBgn0034013	-0.256642	0.0847103	0.0199136	unc-5	NO	NO
FBgn0003732	-0.256389	0.0820464	0.0155679	Top2	YES	NO
FBgn0030366	-0.254158	0.0801126	0.0137134	Usp7	YES	NO
FBgn0085370	-0.253673	0.0771805	0.0102772	Pde11	NO	NO
FBgn0025836	-0.253302	0.094631	0.0448798	RhoGAP1A	NO	NO
FBgn0003044	-0.253128	0.0951898	0.0465134	Pcl	NO	NO
FBgn0085450	-0.253004	0.0927859	0.0401246	Snoo	NO	YES
FBgn0267351	-0.252849	0.0893487	0.0318183	Topors	YES	NO
FBgn0033766	-0.252672	0.078413	0.0121477	CG8771	YES	NO
FBgn0026143	-0.252179	0.0681509	0.00299933	CDC45L	YES	NO
FBgn0016131	-0.252131	0.0683778	0.00313433	Cdk4	NO	NO
FBgn0004390	-0.252101	0.090129	0.0340485	RasGAP1	YES	NO
FBgn0023213	-0.251805	0.0919501	0.0391101	eIF4G	NO	NO
FBgn0038771	-0.251801	0.0709073	0.00472763	CG4390	YES	NO
FBgn0261618	-0.251284	0.0791907	0.0136967	larp	NO	NO
FBgn0035001	-0.25069	0.0790442	0.0137342	slik	YES	NO
FBgn0029094	-0.250248	0.0860346	0.0262921	asf1	YES	NO
FBgn0260934	-0.250172	0.0837225	0.0218123	par-1	YES	YES
FBgn0030049	-0.249563	0.0892742	0.0341504	Trf4-1	YES	NO
FBgn0038244	-0.248895	0.0748944	0.00931223	CG7987	YES	NO
FBgn0031575	-0.248533	0.0821822	0.0201383	Cep97	NO	NO
FBgn0032717	-0.247168	0.0878258	0.0328334	CG10600	YES	NO
FBgn0004237	-0.246204	0.0786581	0.0153851	Hrb87F	YES	YES
FBgn0030177	-0.245241	0.0898611	0.0398926	CG2972	YES	YES
FBgn0022349	-0.242954	0.0839904	0.0274204	CG1910	YES	YES
FBgn0262872	-0.242943	0.0732339	0.00944872	milt	YES	NO
FBgn0004456	-0.242318	0.0721512	0.00839988	mew	NO	NO
FBgn0028500	-0.24204	0.0808911	0.0216132	Rich	YES	NO
FBgn0052699	-0.241347	0.0883317	0.0396685	CG32699	YES	NO
FBgn0034210	-0.241089	0.0853653	0.0321803	CG6568	NO	NO
FBgn0261385	-0.240895	0.0813202	0.0231532	scra	NO	NO
FBgn0001987	-0.240762	0.0863818	0.0347441	Gli	NO	NO
FBgn0004913	-0.239632	0.0713591	0.00840105	Gnf1	YES	NO
FBgn0037720	-0.239468	0.0809394	0.0233868	CG8312	NO	NO
FBgn0031078	-0.239147	0.0811463	0.0239931	Nup205	YES	YES
FBgn0030109	-0.238755	0.0860579	0.0357967	CG12121	YES	NO
FBgn0250876	-0.237891	0.078881	0.0205425	Sema-5c	NO	NO
FBgn0028671	-0.236524	0.0698385	0.00771257	Vha100-1	YES	NO
FBgn0265191	-0.236097	0.072171	0.0106263	Glycogenin	NO	YES
FBgn0044323	-0.235921	0.0829821	0.0307063	Cka	YES	YES
FBgn0051195	-0.235171	0.0753972	0.0157625	CG31195	YES	NO
FBgn0264560	-0.234976	0.0837655	0.033492	garz	YES	NO
FBgn0030809	-0.23485	0.0864605	0.041089	Ubr1	YES	YES
FBgn0019886	-0.234587	0.0798208	0.0244425	Letm1	YES	NO
FBgn0002783	-0.233558	0.0523676	0.000198805	mor	YES	NO
FBgn0003716	-0.232557	0.0706695	0.0101693	tkv	NO	NO
FBgn0032479	-0.232183	0.0773798	0.0212559	CG16974	YES	NO
FBgn0031717	-0.232006	0.0853484	0.0409072	Oscillin	NO	NO
FBgn0086451	-0.231627	0.0783773	0.0235539	l(2)k09022	YES	YES
FBgn0004401	-0.231499	0.0623969	0.00290964	Pep	YES	NO
FBgn0034049	-0.230806	0.0778386	0.0229555	bdg	NO	NO
FBgn0044324	-0.229931	0.0644641	0.00448594	Chro	YES	NO
FBgn0030504	-0.22985	0.0634289	0.00381096	CG2691	YES	NO
FBgn0039227	-0.22913	0.076004	0.0205718	polybromo	YES	YES
FBgn0015396	-0.228982	0.0818109	0.0339955	jumu	NO	NO
FBgn0052296	-0.228853	0.0841385	0.0407681	Mrtf	YES	NO
FBgn0050389	-0.228298	0.0816828	0.0341734	CG30389	YES	NO
FBgn0011703	-0.227383	0.0667009	0.00725256	RnrL	NO	NO
FBgn0259168	-0.226286	0.0825004	0.0387267	mnb	NO	NO
FBgn0036340	-0.225749	0.0631818	0.00439851	SRm160	YES	NO
FBgn0024329	-0.225416	0.0844614	0.0455883	Mekk1	NO	YES
FBgn0259785	-0.225295	0.0738211	0.0186882	pzg	YES	NO
FBgn0003464	-0.225246	0.0813174	0.0362577	sol	YES	YES
FBgn0010246	-0.224012	0.0802353	0.0343813	Myo61F	NO	NO
FBgn0027339	-0.222403	0.0796113	0.0342424	jim	NO	NO
FBgn0266572	-0.222353	0.0820382	0.0416361	ebo	YES	NO
FBgn0027335	-0.222212	0.0691981	0.0124242	Rip11	YES	NO
FBgn0034854	-0.222012	0.0816121	0.0407642	Golgin245	YES	NO
FBgn0014024	-0.220639	0.0718266	0.0177955	Rnp4F	YES	NO
FBgn0005596	-0.220386	0.0715724	0.0174383	yem	YES	YES
FBgn0037248	-0.220331	0.0835237	0.0485404	srl	NO	YES
FBgn0017550	-0.220307	0.0682429	0.0119705	Rga	YES	NO
FBgn0001139	-0.219847	0.0798523	0.0377821	gro	YES	YES
FBgn0020261	-0.219425	0.0784908	0.0341504	pcm	YES	NO
FBgn0036624	-0.218746	0.0607215	0.0040413	RAF2	YES	NO
FBgn0036958	-0.218109	0.0723553	0.0205718	CG17233	NO	NO
FBgn0261004	-0.217063	0.0716715	0.0199492	asl	YES	NO
FBgn0015777	-0.216924	0.0554578	0.00152214	nrv2	NO	NO
FBgn0039877	-0.216716	0.078821	0.0380815	CG2118	YES	NO
FBgn0015799	-0.216465	0.0649047	0.00899435	Rbf	YES	NO
FBgn0046222	-0.216376	0.0722029	0.0214143	CG1109	YES	YES
FBgn0035909	-0.216155	0.0788808	0.0389526	ergic53	YES	YES
FBgn0010452	-0.215169	0.0721029	0.0220392	trn	NO	NO
FBgn0262114	-0.215047	0.0724778	0.0228896	RanBPM	NO	YES
FBgn0052473	-0.214473	0.0679872	0.0144166	CG32473	YES	NO
FBgn0010660	-0.212882	0.0680572	0.0154504	Nup214	YES	NO
FBgn0010352	-0.21284	0.0790037	0.0432453	Nc73EF	YES	NO
FBgn0003567	-0.212337	0.0610803	0.00591949	su(Hw)	YES	NO
FBgn0034087	-0.21191	0.0725347	0.0254504	clu	YES	NO
FBgn0023143	-0.211619	0.0727987	0.0264217	Uba1	YES	YES
FBgn0030354	-0.210976	0.0766219	0.0377724	Upf1	YES	NO
FBgn0032348	-0.210787	0.0684697	0.0174615	CG4751	YES	YES
FBgn0042134	-0.209517	0.0716454	0.0253305	Capr	YES	YES
FBgn0001169	-0.209454	0.0732935	0.0297392	H	YES	YES
FBgn0035033	-0.209383	0.0724625	0.0275991	CG3548	YES	YES
FBgn0011740	-0.207984	0.0781663	0.0464005	alpha-Man-IIa	NO	NO
FBgn0002948	-0.20713	0.0787443	0.0493844	nod	NO	NO
FBgn0030631	-0.204106	0.0657796	0.0164394	CG6227	YES	NO
FBgn0015615	-0.203796	0.0569253	0.0042984	SMC3	YES	NO
FBgn0031736	-0.203071	0.0773203	0.0499144	CG11030	YES	NO
FBgn0027603	-0.203021	0.0724704	0.0337854	Ulp1	YES	NO
FBgn0000636	-0.202378	0.0646336	0.015356	Fas3	NO	YES
FBgn0036522	-0.20232	0.0756779	0.0451151	CG7372	YES	NO
FBgn0250850	-0.199708	0.0731096	0.0396685	rig	NO	NO
FBgn0260991	-0.196487	0.0667881	0.0243003	Incenp	NO	YES
FBgn0023509	-0.195613	0.073075	0.0448798	mip130	YES	NO
FBgn0002638	-0.194788	0.0594505	0.0105334	Rcc1	YES	YES
FBgn0035205	-0.191992	0.0720094	0.0458289	CG2469	YES	NO
FBgn0050122	-0.190242	0.0645001	0.0238855	CG30122	YES	YES
FBgn0031799	-0.189081	0.0713881	0.0476202	Pez	YES	NO
FBgn0000667	-0.188081	0.0581146	0.0117555	Actn	YES	YES
FBgn0010379	-0.18087	0.0608258	0.0225381	Akt1	YES	YES
FBgn0027835	-0.179279	0.0661705	0.0417085	Dp1	YES	NO
FBgn0015805	-0.174329	0.0647525	0.0433687	Rpd3	YES	NO
FBgn0043456	-0.172451	0.0584137	0.0237113	CG4747	YES	YES
FBgn0027588	-0.170155	0.060222	0.0321238	GCS2alpha	YES	NO
FBgn0002542	-0.167889	0.0629163	0.0456152	lds	NO	NO
FBgn0032979	-0.157732	0.0598196	0.0486457	Clamp	YES	NO
FBgn0011211	-0.151938	0.0558114	0.0405824	blw	YES	NO
FBgn0032454	-0.144591	0.0529241	0.0396685	CG5787	YES	NO
FBgn0028479	0.158807	0.0573958	0.0365529	Mtpalpha	YES	NO
FBgn0039737	0.182109	0.0646865	0.032759	CG7920	YES	NO
FBgn0040394	0.182876	0.0650659	0.0330615	CG16903	YES	YES
FBgn0014366	0.186051	0.0645991	0.0282776	noi	YES	NO
FBgn0038854	0.18917	0.0662256	0.0297837	CG7044	YES	NO
FBgn0036302	0.189876	0.0708114	0.0444761	sowah	YES	NO
FBgn0037135	0.1909	0.0593722	0.012373	CG7414	YES	YES
FBgn0004915	0.193562	0.0732595	0.0481514	TfIIB	YES	YES
FBgn0083978	0.196587	0.073738	0.0458289	CG17672	NO	YES
FBgn0051368	0.198448	0.0738458	0.0438972	CG31368	YES	YES
FBgn0027549	0.200948	0.0618464	0.0113226	CG7927	YES	YES
FBgn0031850	0.201403	0.0695001	0.0270691	Tsp	NO	NO
FBgn0002521	0.201816	0.0643098	0.0150388	pho	NO	NO
FBgn0016701	0.205791	0.0758578	0.0414061	Rab4	YES	NO
FBgn0024432	0.206494	0.0749199	0.0375354	Dlc90F	YES	NO
FBgn0026713	0.207992	0.0643748	0.011883	l(1)G0007	YES	YES
FBgn0035830	0.208934	0.0782159	0.0452945	CG8209	YES	NO
FBgn0260456	0.208937	0.078574	0.0465134	CG4806	YES	NO
FBgn0033474	0.209418	0.0662255	0.0140921	CG1407	YES	NO
FBgn0037758	0.210485	0.0769071	0.0392353	CG9467	YES	YES
FBgn0032213	0.211685	0.0664465	0.0133304	CG5390	NO	NO
FBgn0035103	0.212444	0.0660936	0.0123815	Vdup1	NO	NO
FBgn0261065	0.212991	0.0760183	0.0337854	Cpsf73	YES	NO
FBgn0014184	0.213129	0.0733759	0.0265749	Oda	YES	YES
FBgn0033434	0.214485	0.0752333	0.0301389	CG1902	YES	NO
FBgn0033879	0.215762	0.0788076	0.039164	CG6543	YES	NO
FBgn0027601	0.216285	0.074169	0.0258538	pdgy	NO	YES
FBgn0040207	0.216436	0.077979	0.0357612	kat80	YES	NO
FBgn0035471	0.216788	0.0630902	0.00669743	Sc2	YES	YES
FBgn0046258	0.217109	0.0716442	0.0198989	CG12880	NO	NO
FBgn0052438	0.218351	0.0729845	0.0216255	SMC5	YES	NO
FBgn0015320	0.218531	0.0722085	0.0200427	Ubc2	YES	NO
FBgn0053523	0.219041	0.0764127	0.0290758	Vap-33B	YES	NO
FBgn0011741	0.219239	0.0828786	0.0478825	Arp6	YES	NO
FBgn0030734	0.220108	0.0797589	0.0372404	CG9911	YES	YES
FBgn0263916	0.220572	0.0602905	0.0034057	Ent2	YES	NO
FBgn0016687	0.220825	0.0719106	0.0178392	Nurf-38	YES	NO
FBgn0031098	0.221776	0.0673807	0.0101638	CG17068	YES	NO
FBgn0029093	0.22259	0.0670597	0.00942236	cathD	YES	YES
FBgn0086371	0.222633	0.084795	0.0499936	poly	NO	NO
FBgn0260742	0.223785	0.0649944	0.00655845	CG12213	YES	NO
FBgn0028703	0.224784	0.0817939	0.0382057	Nhe3	YES	NO
FBgn0037347	0.225042	0.0834441	0.042986	CG1427	NO	NO
FBgn0020513	0.225075	0.0692889	0.0113421	ade5	NO	NO
FBgn0031878	0.226839	0.0814175	0.0348094	sip2	NO	NO
FBgn0031832	0.227088	0.0803517	0.0320984	CG9596	YES	NO
FBgn0027090	0.227325	0.0661948	0.00671385	Aats-gln	YES	NO
FBgn0032409	0.227896	0.0838098	0.0408342	Ced-12	NO	NO
FBgn0086378	0.228335	0.0847651	0.0432581	Alg-2	NO	NO
FBgn0038065	0.228567	0.0785547	0.026251	Snx3	YES	NO
FBgn0025373	0.228952	0.0743355	0.0174083	Fpps	YES	YES
FBgn0011746	0.229645	0.0792898	0.0271668	ana	NO	NO
FBgn0261988	0.230592	0.0804292	0.0290632	Gprk2	YES	NO
FBgn0020388	0.230839	0.0720047	0.0125822	Gcn5	YES	NO
FBgn0038704	0.232878	0.0737352	0.0142624	CG5316	NO	NO
FBgn0031050	0.233014	0.0844857	0.037403	Arp10	YES	NO
FBgn0036516	0.233099	0.0780937	0.0220089	CG7656	YES	YES
FBgn0003514	0.233949	0.0820965	0.0302359	sqh	YES	NO
FBgn0011290	0.234192	0.0791599	0.0233868	Taf12	YES	NO
FBgn0025635	0.234283	0.07683	0.0187974	CG17829	YES	YES
FBgn0026751	0.234606	0.0885002	0.0474197	XRCC1	NO	NO
FBgn0025742	0.234826	0.0797267	0.0240891	mtm	YES	YES
FBgn0024833	0.235244	0.065382	0.00407233	AP-1mu	YES	NO
FBgn0039140	0.236399	0.0796416	0.0228357	Miro	YES	YES
FBgn0034753	0.236699	0.0804757	0.0243163	CG2852	YES	YES
FBgn0264816	0.237171	0.0895731	0.0476799	koko	YES	YES
FBgn0032704	0.238518	0.0772394	0.0170808	Jwa	YES	NO
FBgn0026207	0.239021	0.0799392	0.0217294	mbo	NO	NO
FBgn0003117	0.239275	0.0762309	0.0150306	pnr	NO	NO
FBgn0039269	0.239814	0.0832983	0.0282776	veli	YES	NO
FBgn0037538	0.240533	0.0889953	0.0423761	CG3223	YES	NO
FBgn0037721	0.240567	0.088847	0.0418668	CG9427	NO	NO
FBgn0050499	0.240757	0.0752042	0.0127305	CG30499	YES	YES
FBgn0263863	0.240955	0.0846802	0.0305936	mRpL45	NO	NO
FBgn0038842	0.241003	0.0589933	0.000810768	hdly	NO	NO
FBgn0035981	0.241551	0.0870183	0.0357535	CG4452	YES	NO
FBgn0035251	0.242295	0.0806572	0.0210695	CG7967	YES	NO
FBgn0034728	0.242415	0.0764923	0.0138202	rad50	NO	NO
FBgn0031048	0.242755	0.071451	0.00745801	CG12237	YES	YES
FBgn0033015	0.243325	0.077911	0.0156352	d4	YES	NO
FBgn0031285	0.244318	0.0616746	0.00126771	CG3662	YES	NO
FBgn0039849	0.244403	0.0667577	0.00338151	CG11334	YES	NO
FBgn0025352	0.244884	0.0759198	0.0120475	Thiolase	YES	NO
FBgn0036053	0.244901	0.0701837	0.00570098	iPLA2-VIA	YES	NO
FBgn0034902	0.24544	0.0893228	0.0382255	CG5532	YES	NO
FBgn0037644	0.245586	0.0684026	0.00415513	CG11964	YES	YES
FBgn0026150	0.246708	0.0903355	0.0397146	ApepP	NO	NO
FBgn0031661	0.247229	0.0797539	0.0165157	Gmd	YES	NO
FBgn0034963	0.248135	0.084373	0.0243226	Not11	YES	NO
FBgn0023545	0.248396	0.0880457	0.0323458	CG4406	YES	YES
FBgn0261555	0.249108	0.074587	0.0088832	CG42673	NO	NO
FBgn0003978	0.249879	0.0937426	0.0458594	vls	YES	YES
FBgn0030671	0.249903	0.0948444	0.0488609	CG8134	YES	YES
FBgn0040323	0.250647	0.0737498	0.00744621	GNBP1	NO	NO
FBgn0033925	0.250741	0.0925709	0.0417698	CG8617	YES	NO
FBgn0038472	0.250745	0.0856257	0.0251275	CG3995	YES	NO
FBgn0035390	0.251852	0.0834502	0.02043	scramb2	YES	NO
FBgn0030274	0.252169	0.0902709	0.0342424	Lint-1	YES	NO
FBgn0086683	0.252242	0.0760197	0.0094444	Spf45	YES	NO
FBgn0260744	0.252279	0.0692604	0.00358896	Tango9	YES	NO
FBgn0035877	0.252344	0.0923569	0.0396685	CG7083	YES	NO
FBgn0037998	0.252388	0.0800599	0.0145081	CG4848	NO	NO
FBgn0264607	0.252449	0.0800878	0.0145109	CaMKII	NO	NO
FBgn0000330	0.25316	0.0797303	0.0136675	cm	YES	NO
FBgn0019972	0.253934	0.0793815	0.0128017	Drice	YES	NO
FBgn0038536	0.254215	0.0934541	0.0407642	CG7655	YES	NO
FBgn0037374	0.254337	0.0799987	0.0135284	jagn	Yes	NO
FBgn0037200	0.254549	0.0926628	0.0382857	CG11109	NO	NO
FBgn0032949	0.255272	0.0849451	0.0210091	Lamp1	YES	NO
FBgn0030114	0.255444	0.0807505	0.0140565	CG17754	YES	YES
FBgn0086912	0.256623	0.0786947	0.0109395	mbm	YES	YES
FBgn0037822	0.256671	0.0698141	0.00322003	CG14683	YES	NO
FBgn0033571	0.256742	0.0775948	0.00964808	Rpb5	YES	NO
FBgn0040321	0.256985	0.0697917	0.00317215	GNBP3	NO	NO
FBgn0034646	0.257441	0.0899115	0.0292909	Rae1	YES	YES
FBgn0033101	0.258462	0.0846119	0.0185485	CG9436	NO	NO
FBgn0024194	0.25875	0.0915014	0.03198	rasp	NO	NO
FBgn0032229	0.259476	0.0960414	0.0424833	CG5045	YES	NO
FBgn0086346	0.259571	0.0615908	0.000508903	ALiX	YES	NO
FBgn0030122	0.259911	0.0867022	0.0213794	CG16892	YES	NO
FBgn0023477	0.25997	0.0902911	0.0282776	Taldo	YES	NO
FBgn0000318	0.261028	0.0914231	0.0298496	cl	YES	NO
FBgn0010356	0.261164	0.0793659	0.0101693	Taf5	YES	NO
FBgn0036155	0.261774	0.0759109	0.0064783	CG6163	NO	NO
FBgn0003900	0.262348	0.0973507	0.0431664	twi	NO	NO
FBgn0024956	0.262753	0.0917266	0.0292189	Mat1	NO	NO
FBgn0037468	0.263118	0.0885939	0.0227507	CG1943	NO	NO
FBgn0030659	0.263566	0.0985249	0.0449967	CG9215	YES	NO
FBgn0026873	0.263937	0.087436	0.0204051	MED18	YES	NO
FBgn0031310	0.26419	0.0970754	0.0406598	Vps29	YES	YES
FBgn0035083	0.26433	0.0662489	0.00115292	Tina-1	NO	NO
FBgn0027786	0.264385	0.070528	0.00261805	Mtch	YES	NO
FBgn0265464	0.265784	0.0656892	0.000938871	Traf6	YES	NO
FBgn0033972	0.266077	0.0914024	0.0261543	Ciao1	YES	YES
FBgn0036909	0.266829	0.0895499	0.022239	CG15881	YES	NO
FBgn0037756	0.266874	0.096409	0.036436	CG8507	YES	NO
FBgn0032702	0.267008	0.101701	0.0499936	CG10376	YES	NO
FBgn0261109	0.267129	0.073552	0.00372438	mrn	YES	YES
FBgn0032820	0.267196	0.0946722	0.0322764	fbp	NO	NO
FBgn0032884	0.267779	0.0972783	0.0378053	Pomp	YES	YES
FBgn0037262	0.267844	0.088585	0.0201596	MED31	YES	NO
FBgn0040075	0.267943	0.0645135	0.00063982	rept	YES	NO
FBgn0039557	0.268217	0.0863537	0.016325	CG12259	YES	YES
FBgn0037739	0.26961	0.0721042	0.00268943	CG12948	YES	NO
FBgn0036648	0.269796	0.101813	0.0475282	CG4098	NO	NO
FBgn0038360	0.270496	0.0939281	0.0282776	CG9590	YES	NO
FBgn0025615	0.271237	0.0874288	0.0164523	Torsin	YES	NO
FBgn0029999	0.271479	0.0994557	0.0398543	CG1575	YES	NO
FBgn0025720	0.271572	0.0789833	0.00666292	Ate1	YES	NO
FBgn0263697	0.271786	0.0898554	0.0201371	Uba3	YES	NO
FBgn0050496	0.272247	0.0901585	0.0203533	CG30496	YES	NO
FBgn0024814	0.272288	0.0999488	0.0403729	Clc	YES	NO
FBgn0031782	0.272291	0.0898614	0.0198989	WDR79	YES	NO
FBgn0000083	0.272852	0.0745902	0.00340714	AnxB9	NO	NO
FBgn0038327	0.27293	0.0915848	0.0222273	Trax	NO	NO
FBgn0028506	0.273012	0.0730568	0.00270458	CG4455	NO	NO
FBgn0026380	0.273307	0.091643	0.0221011	Prosbeta3	YES	NO
FBgn0037220	0.273378	0.0914781	0.0218059	CG14641	YES	NO
FBgn0030616	0.274248	0.101648	0.0429004	RpL37a	YES	NO
FBgn0032407	0.27592	0.0758685	0.00366354	Pex19	YES	NO
FBgn0032246	0.276449	0.0829219	0.00901704	CG5168	YES	NO
FBgn0259993	0.276649	0.0891457	0.0164292	CR42491	NO	NO
FBgn0053158	0.277087	0.0940368	0.0240149	CG33158	YES	NO
FBgn0040382	0.277626	0.0920304	0.0205019	CG5273	YES	NO
FBgn0040309	0.278033	0.0660909	0.000524094	Jafrac1	NO	YES
FBgn0038180	0.278413	0.0718883	0.00173024	Cht5	NO	NO
FBgn0039914	0.278737	0.0780744	0.00443498	mav	NO	NO
FBgn0030789	0.278779	0.0980616	0.0307063	Rrp45	YES	NO
FBgn0029937	0.278999	0.074556	0.00267437	CG8300	YES	NO
FBgn0037202	0.279038	0.0786227	0.00475521	Ssl1	YES	NO
FBgn0033483	0.279553	0.105276	0.0469652	egr	NO	YES
FBgn0033401	0.27972	0.0751305	0.00282709	CG1968	YES	NO
FBgn0023212	0.280426	0.0937049	0.0215974	EloB	YES	YES
FBgn0022702	0.280811	0.0868647	0.0118454	Cht2	NO	YES
FBgn0039155	0.281421	0.0659868	0.000424019	Kal1	NO	YES
FBgn0039304	0.281492	0.106373	0.0478352	CG10425	YES	YES
FBgn0037710	0.281502	0.0966205	0.0260118	CG9393	YES	NO
FBgn0053217	0.282503	0.092883	0.0192629	CG33217	NO	NO
FBgn0037369	0.283205	0.101248	0.0340485	CG2100	NO	NO
FBgn0035906	0.283215	0.086554	0.0106263	GstO2	YES	NO
FBgn0028984	0.283228	0.0619532	0.000124602	Spn88Ea	NO	NO
FBgn0040660	0.283554	0.0922563	0.0177092	CG13551	YES	NO
FBgn0038578	0.283943	0.0825923	0.00666292	MED17	YES	NO
FBgn0024909	0.284126	0.107498	0.0480476	Taf7	YES	NO
FBgn0053993	0.284345	0.0771804	0.00315211	CG33993	NO	NO
FBgn0030749	0.284368	0.0688965	0.000707245	AnxB11	YES	NO
FBgn0034110	0.284681	0.108134	0.0490872	Atg9	YES	YES
FBgn0035425	0.285727	0.0850283	0.00837075	CG17746	YES	NO
FBgn0002791	0.286017	0.0674929	0.000466891	mr	YES	NO
FBgn0028990	0.286239	0.0641382	0.000197161	Spn27A	NO	NO
FBgn0033225	0.286539	0.0850886	0.00819388	CG1550	YES	NO
FBgn0035825	0.286639	0.0969627	0.0235048	CG8111	YES	YES
FBgn0031322	0.28679	0.0784803	0.00344708	CG5001	NO	YES
FBgn0035482	0.28691	0.102949	0.034748	CG14985	YES	NO
FBgn0000447	0.287051	0.0818416	0.00541762	Dhod	YES	NO
FBgn0016038	0.287109	0.0721645	0.00120164	mod(r)	YES	NO
FBgn0026077	0.288663	0.0737544	0.0015156	Gasp	NO	NO
FBgn0003330	0.288882	0.0834473	0.00620176	Sce	YES	NO
FBgn0010406	0.290858	0.0901216	0.0119953	RNaseX25	NO	NO
FBgn0026749	0.290931	0.0948924	0.0180552	Yippee	YES	NO
FBgn0031459	0.291661	0.101918	0.0294124	CG2862	YES	NO
FBgn0036547	0.291946	0.0834287	0.00554155	CG17032	NO	NO
FBgn0035515	0.291952	0.087711	0.00917819	CG14997	NO	NO
FBgn0033751	0.292423	0.0757588	0.00180967	CG8818	YES	YES
FBgn0035203	0.292918	0.07112	0.000727433	CG9149	YES	NO
FBgn0037298	0.29336	0.072498	0.000938871	CG2604	YES	NO
FBgn0029174	0.293556	0.0834331	0.00526345	FKBP59	YES	NO
FBgn0262057	0.294473	0.0676058	0.000297838	Spn77Ba	NO	NO
FBgn0040475	0.294642	0.0720235	0.000794355	SH3PX1	YES	NO
FBgn0029785	0.294684	0.0989676	0.0223541	RpL35	YES	NO
FBgn0023516	0.29489	0.106129	0.0355081	Pex5	YES	NO
FBgn0263398	0.294894	0.0840581	0.00541473	CG6364	YES	YES
FBgn0036824	0.29539	0.0864276	0.00707259	CG3902	NO	NO
FBgn0014028	0.29597	0.0835695	0.00486669	SdhB	YES	NO
FBgn0260798	0.296147	0.0912108	0.0113792	Gprk1	YES	NO
FBgn0045866	0.296196	0.0898377	0.0100167	bai	YES	NO
FBgn0031813	0.296216	0.101347	0.025365	CG9527	NO	NO
FBgn0264922	0.296307	0.102179	0.0269389	smt3	YES	YES
FBgn0035714	0.296572	0.111311	0.0459699	CG8549	YES	NO
FBgn0020018	0.298485	0.0903267	0.009774	Ppox	YES	NO
FBgn0039116	0.29877	0.0784106	0.00213046	CG10375	YES	NO
FBgn0015296	0.299041	0.0826598	0.00386843	Shc	YES	NO
FBgn0061476	0.299228	0.0880645	0.00745801	Zwilch	YES	NO
FBgn0027903	0.300311	0.0883588	0.00744621	CG12018	YES	NO
FBgn0022943	0.300474	0.111774	0.0438077	Cbp20	YES	NO
FBgn0260747	0.300697	0.104449	0.0282776	CG5010	YES	NO
FBgn0015905	0.301254	0.0758201	0.00122177	ast	NO	NO
FBgn0020270	0.302618	0.0818617	0.00303588	mre11	NO	NO
FBgn0035707	0.302909	0.0952457	0.0135146	CG8368	YES	NO
FBgn0028515	0.303221	0.0841889	0.00404244	EndoGI	YES	NO
FBgn0026373	0.303642	0.0925125	0.0104117	RpII33	YES	YES
FBgn0035059	0.304577	0.100543	0.0199167	CG3894	YES	NO
FBgn0031360	0.305241	0.0893737	0.00711087	CG31937	YES	YES
FBgn0021814	0.306328	0.105888	0.0274166	Vps28	YES	NO
FBgn0039360	0.306372	0.0964984	0.0136675	CLS	YES	NO
FBgn0033934	0.306476	0.0936442	0.010621	CG17385	YES	NO
FBgn0061492	0.306606	0.107443	0.0299695	loj	YES	NO
FBgn0034576	0.306615	0.102204	0.0212569	ND-B14.7	YES	NO
FBgn0027526	0.306971	0.114172	0.0437765	Ublcp1	YES	NO
FBgn0031713	0.307476	0.0791345	0.00165893	CG7277	NO	NO
FBgn0030263	0.307874	0.105719	0.0261005	CG2076	YES	NO
FBgn0035057	0.308068	0.105912	0.0262921	CG3880	NO	NO
FBgn0038035	0.308435	0.103991	0.0229344	lig3	NO	NO
FBgn0035438	0.308535	0.0990275	0.015889	PHGPx	YES	NO
FBgn0032200	0.30894	0.101115	0.018525	CG5676	NO	NO
FBgn0038877	0.309531	0.0860789	0.00409966	CG3308	YES	NO
FBgn0030802	0.310589	0.115179	0.0430034	DENR	YES	NO
FBgn0050440	0.313777	0.0896466	0.00553855	CG30440	NO	NO
FBgn0033556	0.314527	0.112053	0.0333776	CG12343	YES	NO
FBgn0036462	0.314766	0.0925369	0.00740118	mRpL39	YES	NO
FBgn0024804	0.316072	0.0725237	0.000295219	Dbp80	NO	NO
FBgn0026257	0.31662	0.114684	0.0371381	cav	YES	NO
FBgn0032700	0.316636	0.096283	0.010221	CG10338	YES	NO
FBgn0266375	0.316781	0.101202	0.0153851	IP3K2	NO	NO
FBgn0032030	0.317433	0.0921587	0.00653557	Wdr82	YES	NO
FBgn0030678	0.317438	0.108906	0.0259428	CG11679	YES	NO
FBgn0053977	0.318264	0.12023	0.0477429	CG33977	NO	NO
FBgn0260861	0.318289	0.120345	0.0479214	Trs23	YES	NO
FBgn0260460	0.318421	0.11563	0.0377607	mRpS34	YES	NO
FBgn0040658	0.319178	0.115958	0.0378053	CG13516	NO	NO
FBgn0024957	0.320163	0.0568301	8.34108e-07	Irp-1B	NO	NO
FBgn0262560	0.320232	0.0949066	0.00802623	wcd	YES	NO
FBgn0033906	0.320528	0.0869325	0.00313433	CG8331	YES	NO
FBgn0032031	0.320703	0.119634	0.044545	CG13390	NO	NO
FBgn0027546	0.321226	0.0780273	0.000731648	CG4766	NO	NO
FBgn0035243	0.321255	0.11151	0.0282634	CG13926	YES	NO
FBgn0035528	0.321367	0.088082	0.00351078	CG15012	YES	NO
FBgn0034022	0.321731	0.120626	0.045758	CG12964	NO	NO
FBgn0019949	0.321893	0.107814	0.021971	Cdk9	YES	YES
FBgn0037299	0.321954	0.0981364	0.0104445	Vps37B	YES	NO
FBgn0036314	0.322828	0.092135	0.0054762	CG10754	YES	YES
FBgn0036165	0.32309	0.0915573	0.00507464	chrb	NO	NO
FBgn0040064	0.32311	0.083886	0.00186084	yip2	YES	NO
FBgn0031678	0.323124	0.0801716	0.000999917	CG31918	NO	NO
FBgn0032774	0.323381	0.0881824	0.00333005	CG17549	NO	NO
FBgn0039543	0.323494	0.0927275	0.00571031	CG12428	NO	NO
FBgn0046763	0.323751	0.110403	0.0248734	CG17278	NO	NO
FBgn0037609	0.324729	0.0965305	0.00827079	CG9773	YES	NO
FBgn0043001	0.326045	0.0974462	0.0087088	Chrac-16	YES	YES
FBgn0030506	0.326061	0.123245	0.0478782	Lig4	YES	NO
FBgn0016685	0.326066	0.0790184	0.000707457	Nlp	YES	NO
FBgn0025629	0.326085	0.0809677	0.00101111	CG4045	YES	NO
FBgn0035588	0.326215	0.11924	0.0393298	CG10672	YES	NO
FBgn0036405	0.326725	0.108916	0.0212569	CG6833	YES	YES
FBgn0036967	0.327348	0.0797106	0.000753809	CG6597	YES	NO
FBgn0034915	0.327563	0.0882578	0.0028988	eIF6	YES	YES
FBgn0037882	0.328227	0.122407	0.0444761	CG17187	NO	NO
FBgn0261673	0.32844	0.103256	0.0135146	nemy	NO	NO
FBgn0022724	0.329209	0.113798	0.0274166	Taf8	YES	NO
FBgn0036290	0.329504	0.100306	0.0103231	CG10638	YES	NO
FBgn0033350	0.329721	0.102224	0.0120475	CG8237	YES	YES
FBgn0035401	0.330019	0.0986009	0.00868547	CG1291	YES	NO
FBgn0036538	0.331571	0.116044	0.0297392	CG15715	NO	NO
FBgn0029818	0.33206	0.0687367	4.15271e-05	GAA1	NO	YES
FBgn0031092	0.332817	0.0911061	0.0034587	CG9577	NO	NO
FBgn0038738	0.332996	0.0964176	0.00636901	CG4572	NO	NO
FBgn0031848	0.333065	0.113136	0.024167	Nse1	NO	NO
FBgn0036908	0.333273	0.0948704	0.00536041	CG14103	YES	NO
FBgn0015808	0.334395	0.0836186	0.00111858	ScpX	NO	NO
FBgn0040337	0.334904	0.111516	0.0211072	CG3021	YES	YES
FBgn0261436	0.335267	0.0744586	0.00016526	DhpD	YES	NO
FBgn0267398	0.336544	0.102807	0.0106162	Yeti	YES	NO
FBgn0034727	0.336687	0.113675	0.0231696	mRpS29	YES	NO
FBgn0037848	0.337931	0.086788	0.00161252	Tsp86D	YES	NO
FBgn0026404	0.337982	0.11786	0.0290621	Dronc	YES	NO
FBgn0030160	0.338262	0.0938742	0.00403274	CG9691	NO	NO
FBgn0038400	0.339125	0.0894566	0.00225597	CG5903	YES	YES
FBgn0032863	0.339895	0.0941209	0.00395502	Cdc23	YES	NO
FBgn0014092	0.340198	0.0960511	0.00486669	CG4278	NO	NO
FBgn0030026	0.34054	0.121554	0.0337854	sni	NO	NO
FBgn0020299	0.342006	0.0919693	0.00284978	stumps	NO	NO
FBgn0030082	0.342206	0.0741553	0.000106438	HP1b	YES	NO
FBgn0266124	0.342719	0.119314	0.0287559	ghi	YES	NO
FBgn0035519	0.343433	0.0787253	0.000290266	CG1309	YES	NO
FBgn0011289	0.344974	0.0768091	0.00017391	TfIIA-L	YES	YES
FBgn0033777	0.34632	0.122611	0.0321704	CG17574	NO	NO
FBgn0027507	0.346531	0.084277	0.000740303	CG1344	YES	NO
FBgn0035334	0.346589	0.105734	0.010524	CG8993	YES	NO
FBgn0030099	0.347007	0.129374	0.0444598	CG12056	YES	NO
FBgn0264294	0.34716	0.0970623	0.0043488	Cyt-b5	YES	YES
FBgn0035715	0.347244	0.0712139	3.41964e-05	CG10103	YES	NO
FBgn0034403	0.348086	0.0915169	0.0021658	CG18190	NO	NO
FBgn0031320	0.34837	0.0868517	0.00107107	CG5126	YES	NO
FBgn0039637	0.349474	0.0968871	0.0040035	CG11880	YES	NO
FBgn0034503	0.351261	0.114899	0.0184452	MED8	YES	NO
FBgn0038928	0.351483	0.132946	0.0480345	Fadd	YES	NO
FBgn0037019	0.352703	0.113446	0.0161773	Pex16	YES	NO
FBgn0037297	0.353114	0.0872388	0.000936138	CG1116	YES	NO
FBgn0036846	0.353185	0.0891154	0.00126277	MESR6	YES	NO
FBgn0259171	0.35337	0.116423	0.0195996	Pde9	NO	NO
FBgn0038300	0.353372	0.0943361	0.00263897	CG4203	YES	YES
FBgn0052099	0.354188	0.134262	0.0485404	CG32099	YES	NO
FBgn0035089	0.354832	0.0766961	0.000101451	Phk-3	NO	NO
FBgn0033122	0.355294	0.0770382	0.000107267	CG17002	YES	NO
FBgn0001091	0.355769	0.0865154	0.000740303	Gapdh1	YES	NO
FBgn0263260	0.35785	0.104825	0.00714338	sel	YES	NO
FBgn0011274	0.358065	0.135815	0.0486683	Dif	NO	NO
FBgn0001276	0.358756	0.129116	0.0355081	ix	YES	YES
FBgn0031263	0.359036	0.104197	0.006527	Tspo	YES	NO
FBgn0083961	0.360336	0.122495	0.0243058	CG34125	YES	NO
FBgn0029915	0.361412	0.100208	0.00400453	CG14434	NO	NO
FBgn0032793	0.36193	0.134809	0.0441489	CG10189	YES	NO
FBgn0034725	0.362214	0.110374	0.0104187	CG6044	NO	NO
FBgn0026085	0.364767	0.124524	0.0250738	dgt4	NO	NO
FBgn0033356	0.366596	0.0918635	0.00115246	CG8229	YES	NO
FBgn0051728	0.367382	0.101551	0.00386843	CG31728	NO	NO
FBgn0039111	0.367471	0.112821	0.0110553	Plip	YES	NO
FBgn0038262	0.368379	0.125467	0.024629	CG14857	NO	NO
FBgn0033038	0.368509	0.0721783	1.20306e-05	CG7791	YES	NO
FBgn0039558	0.368799	0.100175	0.00317536	BCAS2	YES	NO
FBgn0026400	0.370216	0.0968151	0.0020427	Noa36	YES	NO
FBgn0032230	0.370417	0.0814201	0.000136053	lft	NO	NO
FBgn0000116	0.370666	0.0973574	0.00214969	Argk	NO	NO
FBgn0039341	0.371266	0.064372	4.04861e-07	CG5112	YES	YES
FBgn0038983	0.371383	0.115556	0.0123815	CG5326	NO	NO
FBgn0034399	0.371653	0.0906457	0.000772695	CG15083	NO	NO
FBgn0031777	0.372687	0.112454	0.00949877	CG9154	YES	NO
FBgn0035539	0.372937	0.0741968	1.74898e-05	slow	NO	NO
FBgn0034057	0.372977	0.0794311	7.53414e-05	CG8314	YES	NO
FBgn0028886	0.373131	0.132765	0.0330615	CG15279	NO	NO
FBgn0039328	0.373996	0.137817	0.0413249	CHKov2	NO	NO
FBgn0030057	0.374142	0.0813234	0.000111948	Ppt1	NO	NO
FBgn0038446	0.374174	0.140998	0.0471167	CG14903	NO	NO
FBgn0032234	0.37459	0.114797	0.0108822	gny	YES	NO
FBgn0024887	0.374849	0.109235	0.00677031	kin17	YES	YES
FBgn0035210	0.374944	0.116704	0.0123817	msd5	NO	NO
FBgn0032691	0.374988	0.0825236	0.000139239	Atac2	YES	YES
FBgn0015247	0.376925	0.0813286	9.81189e-05	Diap2	YES	NO
FBgn0000370	0.377755	0.0685224	1.56702e-06	crc	YES	NO
FBgn0036641	0.378195	0.0784426	4.34197e-05	Smn	YES	NO
FBgn0035209	0.378249	0.118717	0.0133277	msd1	NO	NO
FBgn0266667	0.378596	0.0789468	4.8454e-05	Exo70	YES	NO
FBgn0039698	0.379062	0.113598	0.00896852	CG7789	YES	YES
FBgn0265531	0.379694	0.126739	0.0214595	CR44381	NO	NO
FBgn0030342	0.380034	0.0905551	0.00054336	CG10347	YES	NO
FBgn0034860	0.381475	0.123015	0.0164969	CG9812	NO	NO
FBgn0039601	0.381745	0.0771917	2.52251e-05	CG1523	YES	NO
FBgn0038965	0.381794	0.0702569	2.38608e-06	mats	YES	NO
FBgn0028932	0.383518	0.137167	0.0341425	CG16890	YES	NO
FBgn0262624	0.3836	0.106448	0.00403274	Tmhs	NO	NO
FBgn0038425	0.38686	0.124422	0.0161768	CG14881	NO	NO
FBgn0260741	0.387078	0.140414	0.03753	CG3281	YES	NO
FBgn0032202	0.387376	0.123982	0.015579	CG18619	NO	NO
FBgn0031664	0.387537	0.0836348	9.82648e-05	CG8892	YES	YES
FBgn0002773	0.387899	0.102224	0.00222995	Mlc2	NO	YES
FBgn0029766	0.389324	0.147162	0.0478782	CG15784	NO	YES
FBgn0035901	0.389629	0.119134	0.010645	CG6745	YES	NO
FBgn0035249	0.391189	0.0969198	0.000977355	CG17249	YES	NO
FBgn0034405	0.391205	0.0840673	9.03333e-05	Jheh2	NO	NO
FBgn0262887	0.392186	0.121465	0.0119603	CR43242	NO	NO
FBgn0030239	0.393256	0.136995	0.0288802	CG17333	YES	NO
FBgn0000261	0.3946	0.0885192	0.000200314	Cat	YES	NO
FBgn0266521	0.39526	0.0607337	5.72978e-09	stai	NO	NO
FBgn0000723	0.396306	0.0960374	0.000707457	FER	NO	NO
FBgn0035993	0.396344	0.101312	0.00152118	Nf-YA	YES	NO
FBgn0031739	0.396468	0.120695	0.0103231	CG14005	YES	YES
FBgn0263143	0.396487	0.0916185	0.000332996	vret	NO	NO
FBgn0032132	0.398342	0.079637	1.95607e-05	CG4382	NO	NO
FBgn0032000	0.399715	0.0950412	0.000525566	CG8372	YES	NO
FBgn0259682	0.400468	0.139362	0.028671	Jabba	NO	NO
FBgn0035838	0.404801	0.109642	0.00308319	ldbr	YES	YES
FBgn0029798	0.405036	0.0936991	0.000339616	CG4078	YES	YES
FBgn0033226	0.406059	0.119479	0.00744621	CG1882	YES	YES
FBgn0036335	0.406963	0.122003	0.00898621	mRpL20	YES	NO
FBgn0033431	0.407687	0.122507	0.00918091	CG1827	NO	NO
FBgn0039555	0.409062	0.0954754	0.000396233	mRpS22	YES	YES
FBgn0052095	0.409214	0.124871	0.0105304	CG32095	YES	NO
FBgn0032248	0.409352	0.0851115	4.5614e-05	Bug22	YES	NO
FBgn0037637	0.411151	0.0933168	0.0002447	IscU	YES	NO
FBgn0027784	0.412256	0.141855	0.0264627	Prp18	YES	NO
FBgn0001977	0.413205	0.070282	2.25488e-07	CIAPIN1	YES	NO
FBgn0032923	0.413302	0.0630891	4.44202e-09	CG9248	NO	NO
FBgn0037020	0.413488	0.0763518	2.62524e-06	Pex14	YES	NO
FBgn0085732	0.414617	0.13504	0.0178532	CR40190	NO	NO
FBgn0034143	0.416108	0.109076	0.00209533	CG8303	NO	NO
FBgn0036396	0.418257	0.126904	0.0100469	CG17359	NO	NO
FBgn0035831	0.41924	0.109769	0.00207136	CG8038	YES	NO
FBgn0035593	0.420412	0.0831953	1.54766e-05	CG4603	YES	NO
FBgn0038519	0.421543	0.0870199	3.94769e-05	Prx3	YES	NO
FBgn0086758	0.422147	0.136586	0.0169736	chinmo	NO	YES
FBgn0261049	0.422461	0.103343	0.000802953	Vps45	YES	NO
FBgn0029929	0.424403	0.113992	0.00282709	CG4593	YES	NO
FBgn0032646	0.424417	0.0822116	9.21185e-06	CG6412	YES	NO
FBgn0035692	0.425861	0.0992838	0.000389471	CG13298	YES	NO
FBgn0035149	0.427529	0.121687	0.00535905	MED30	YES	YES
FBgn0032597	0.427719	0.109175	0.00149397	CG17904	YES	YES
FBgn0040942	0.42795	0.133021	0.0123187	CG12643	NO	NO
FBgn0030675	0.428235	0.109855	0.00159143	CG8191	YES	NO
FBgn0037295	0.428448	0.12927	0.00949877	dpr16	NO	NO
FBgn0036101	0.428838	0.111667	0.00194038	NijA	NO	NO
FBgn0036342	0.430541	0.125613	0.006847	CG11279	NO	NO
FBgn0030660	0.430701	0.153158	0.0329839	CG8097	NO	NO
FBgn0265532	0.431941	0.139487	0.0166534	CR44382	NO	NO
FBgn0051997	0.432232	0.0846031	1.18627e-05	CG31997	NO	NO
FBgn0053062	0.432391	0.140327	0.0173463	CG33062	NO	NO
FBgn0043841	0.432877	0.0872627	2.37955e-05	vir-1	NO	NO
FBgn0005683	0.434064	0.126618	0.00684086	pie	NO	NO
FBgn0262955	0.434669	0.0536139	7.48796e-14	RpII140	YES	NO
FBgn0040763	0.436216	0.151792	0.028671	CG18336	NO	NO
FBgn0030063	0.436363	0.117046	0.00278824	CG1789	YES	NO
FBgn0025866	0.437104	0.124537	0.0054128	CalpB	YES	NO
FBgn0261628	0.438786	0.153087	0.0290822	CG42711	NO	NO
FBgn0030159	0.439622	0.10388	0.000476845	CG9689	NO	NO
FBgn0050438	0.440477	0.155019	0.0308247	CG30438	NO	NO
FBgn0025621	0.442915	0.094678	8.15657e-05	CG16989	YES	NO
FBgn0037955	0.443425	0.0843467	5.75965e-06	CG6950	NO	NO
FBgn0036774	0.443965	0.104006	0.000417749	mRpS26	YES	YES
FBgn0030658	0.444171	0.116333	0.00207452	CG7872	YES	YES
FBgn0031391	0.44454	0.119887	0.0029252	CG11723	YES	NO
FBgn0037102	0.44612	0.119811	0.00282709	CG7172	YES	YES
FBgn0029648	0.447145	0.0992684	0.000164824	CG3603	NO	NO
FBgn0033555	0.448201	0.105385	0.000441893	RpS15Ab	NO	NO
FBgn0031327	0.450286	0.129363	0.00584368	CG5397	NO	NO
FBgn0030421	0.451712	0.170562	0.0476276	CG3812	NO	NO
FBgn0002734	0.451963	0.142096	0.0135146	E(spl)mdelta-HLH	NO	NO
FBgn0032026	0.452051	0.101826	0.000214867	CG7627	NO	NO
FBgn0250833	0.452993	0.141446	0.0127017	CG34461	NO	NO
FBgn0051076	0.454602	0.154244	0.0239931	CG31076	NO	NO
FBgn0050441	0.45522	0.146624	0.016385	CG30441	NO	NO
FBgn0037603	0.455331	0.123787	0.00320604	CG11753	YES	NO
FBgn0034849	0.456827	0.142799	0.0128017	CG3500	YES	NO
FBgn0052683	0.458598	0.139874	0.0105087	CG32683	NO	NO
FBgn0040279	0.459205	0.164319	0.0341734	Osi14	NO	NO
FBgn0039538	0.45996	0.16517	0.0349108	CG12883	NO	NO
FBgn0035632	0.461025	0.153297	0.0208708	Ppat-Dpck	YES	NO
FBgn0084049	0.46321	0.163995	0.0321704	CR41440	NO	NO
FBgn0264291	0.463296	0.119667	0.00173368	Det	YES	NO
FBgn0037773	0.465711	0.161665	0.0282634	CG5359	NO	NO
FBgn0001114	0.468165	0.165255	0.0315359	Glt	NO	NO
FBgn0033451	0.46844	0.111116	0.000507002	CG1665	NO	NO
FBgn0040823	0.469035	0.139651	0.00839988	dpr6	NO	NO
FBgn0026737	0.469367	0.114309	0.000754234	CG6171	NO	NO
FBgn0028983	0.470321	0.100652	8.29513e-05	Spn55B	YES	NO
FBgn0034430	0.470641	0.0953098	2.60578e-05	mip40	YES	YES
FBgn0267376	0.470926	0.0963873	3.28637e-05	SelR	YES	YES
FBgn0261803	0.471289	0.126165	0.00271216	CG42749	NO	NO
FBgn0039158	0.472643	0.10719	0.000243237	CG6182	YES	NO
FBgn0038296	0.473907	0.109449	0.000330251	CG6752	NO	NO
FBgn0013432	0.474009	0.119835	0.00129258	bcn92	NO	NO
FBgn0264950	0.475596	0.11823	0.00102768	CR44119	NO	NO
FBgn0024945	0.47561	0.093176	1.2055e-05	NitFhit	YES	NO
FBgn0025630	0.476753	0.108601	0.000261502	CG4061	YES	NO
FBgn0013680	0.477726	0.180922	0.0483227	mt:ND2	-	-
FBgn0259736	0.478274	0.172341	0.0357812	CG42390	NO	NO
FBgn0038312	0.478782	0.151769	0.0144166	Zip88E	YES	NO
FBgn0035754	0.480032	0.124096	0.00175438	MED4	YES	NO
FBgn0037108	0.480344	0.0758706	1.62461e-08	CG11306	YES	NO
FBgn0038302	0.483824	0.115793	0.00058288	CG4210	NO	YES
FBgn0029820	0.484027	0.0861467	8.9659e-07	CG16721	YES	NO
FBgn0030174	0.484195	0.165382	0.025141	CG15312	NO	NO
FBgn0260856	0.484959	0.15288	0.0137172	Membrin	NO	NO
FBgn0035542	0.485083	0.0995765	3.48619e-05	DOR	NO	NO
FBgn0037338	0.486434	0.0874179	1.20116e-06	Snm1	NO	NO
FBgn0002533	0.48723	0.174754	0.034671	Lcp2	NO	NO
FBgn0037653	0.488671	0.0877977	1.20116e-06	CG11982	YES	NO
FBgn0036640	0.48955	0.0984298	2.2408e-05	nxf2	NO	NO
FBgn0035517	0.489673	0.110273	0.000214321	CG1265	NO	NO
FBgn0037719	0.491783	0.0912191	2.96625e-06	bocks	YES	YES
FBgn0037816	0.49577	0.135875	0.00351078	CG6345	YES	NO
FBgn0035414	0.49582	0.115837	0.000400877	CG14965	NO	NO
FBgn0037759	0.496815	0.179806	0.0369059	CG8526	NO	NO
FBgn0015781	0.496869	0.0892911	1.20116e-06	P5cr	YES	NO
FBgn0050403	0.49779	0.141	0.00505044	CG30403	NO	NO
FBgn0039265	0.498074	0.0791438	2.03131e-08	CG11790	YES	NO
FBgn0051344	0.498678	0.0846855	2.14339e-07	CG31344	YES	NO
FBgn0267347	0.499842	0.128087	0.00157251	squ	YES	NO
FBgn0035248	0.499946	0.146875	0.00734593	CG13919	YES	NO
FBgn0033602	0.500827	0.151279	0.00959416	Cpr47Ee	NO	NO
FBgn0032452	0.503023	0.188658	0.0458289	CG15484	NO	NO
FBgn0001255	0.50362	0.123367	0.000819531	ImpE3	YES	NO
FBgn0037011	0.503883	0.102585	2.93773e-05	CG4858	YES	NO
FBgn0002632	0.504688	0.146416	0.00650612	E(spl)m6-BFM	NO	NO
FBgn0267977	0.505022	0.113112	0.000195882	mh	NO	NO
FBgn0030980	0.506029	0.143757	0.00523936	CG7406	NO	NO
FBgn0037244	0.506223	0.098059	9.21185e-06	CG14647	YES	YES
FBgn0267204	0.508497	0.140558	0.00386843	CR45644	NO	NO
FBgn0063494	0.508873	0.192782	0.0483881	GstE6	NO	NO
FBgn0085582	0.508939	0.181351	0.0334131	CR41257	NO	NO
FBgn0264503	0.508941	0.178713	0.0303921	CG43902	NO	NO
FBgn0260226	0.509702	0.166636	0.0183936	CG42500	NO	NO
FBgn0035721	0.510816	0.132405	0.00182037	CG9948	NO	NO
FBgn0020545	0.511111	0.0954191	3.53316e-06	kraken	YES	YES
FBgn0037942	0.516587	0.139295	0.00292287	CG14721	YES	NO
FBgn0266752	0.516735	0.160234	0.0120522	CR45225	NO	NO
FBgn0030484	0.517328	0.0965448	3.51111e-06	GstT4	NO	YES
FBgn0028434	0.519467	0.0983159	5.00697e-06	Ercc1	NO	NO
FBgn0031483	0.520329	0.113484	0.000119299	CG9641	NO	YES
FBgn0038912	0.520927	0.105286	2.50535e-05	CG6656	NO	NO
FBgn0019830	0.522876	0.0866089	9.05258e-08	colt	YES	NO
FBgn0032394	0.523033	0.0819353	1.20656e-08	CG6746	YES	YES
FBgn0260653	0.524514	0.0743271	1.54117e-10	serp	NO	NO
FBgn0005775	0.525634	0.151694	0.00614073	Con	NO	NO
FBgn0034398	0.527997	0.0725682	3.37372e-11	CG15098	YES	NO
FBgn0032462	0.528165	0.193564	0.0399232	CG16800	NO	NO
FBgn0052645	0.530051	0.188407	0.0329094	CG32645	NO	NO
FBgn0039048	0.531413	0.191511	0.0357924	CG17111	NO	NO
FBgn0261113	0.531721	0.0591736	4.64872e-17	Xrp1	NO	NO
FBgn0260779	0.532218	0.122367	0.000305164	gatA	YES	YES
FBgn0035678	0.533321	0.174143	0.0182119	CG10469	NO	NO
FBgn0035904	0.535114	0.101109	4.79164e-06	GstO3	NO	NO
FBgn0058470	0.537475	0.177016	0.0195628	CG40470	NO	NO
FBgn0040296	0.537727	0.143803	0.00268943	Ocho	NO	NO
FBgn0267733	0.537773	0.109285	2.81546e-05	CR46064	NO	NO
FBgn0030300	0.538992	0.167649	0.0123739	Sk1	NO	NO
FBgn0032899	0.539874	0.168054	0.0123817	CG9338	NO	NO
FBgn0259896	0.541707	0.193553	0.0339955	NimC1	NO	NO
FBgn0086254	0.543342	0.0887238	5.54106e-08	CG6084	NO	NO
FBgn0035557	0.543396	0.188856	0.0283991	CG11353	NO	NO
FBgn0032156	0.544443	0.115162	6.53637e-05	CG13124	NO	NO
FBgn0011774	0.545025	0.134383	0.000909591	Irbp	YES	NO
FBgn0000451	0.545243	0.189886	0.0288243	ect	NO	NO
FBgn0011576	0.547721	0.189524	0.0275893	Cyp4d2	NO	NO
FBgn0036116	0.547852	0.193711	0.0319663	CG7888	NO	NO
FBgn0031037	0.548491	0.0845832	6.59055e-09	CG14207	NO	NO
FBgn0038516	0.548512	0.181967	0.0205718	P5cr-2	NO	NO
FBgn0037531	0.549138	0.120967	0.000141459	CG10445	NO	NO
FBgn0035168	0.549912	0.138538	0.00123728	cep290	NO	NO
FBgn0032393	0.551028	0.100399	1.79198e-06	CG12264	YES	NO
FBgn0037342	0.554094	0.121037	0.000123111	CG2931	YES	YES
FBgn0264271	0.555233	0.191573	0.0270556	CR43771	NO	NO
FBgn0030900	0.55748	0.155466	0.00421529	Him	NO	NO
FBgn0036126	0.557857	0.131984	0.000487221	CG6272	YES	NO
FBgn0040551	0.561148	0.10552	4.25668e-06	CG11686	NO	NO
FBgn0030357	0.561384	0.19196	0.0253305	Sclp	NO	NO
FBgn0259711	0.563846	0.176027	0.0126882	CG42365	YES	YES
FBgn0032192	0.56488	0.103419	2.06007e-06	CG5731	NO	NO
FBgn0027111	0.565483	0.106069	3.99011e-06	miple1	NO	NO
FBgn0033866	0.565593	0.154347	0.00334672	CG6280	NO	NO
FBgn0053494	0.566322	0.18268	0.0165157	CG33494	NO	NO
FBgn0033446	0.566717	0.0922403	4.91958e-08	CG1648	NO	NO
FBgn0035942	0.567671	0.143126	0.00124932	CG5660	NO	NO
FBgn0037223	0.569245	0.156936	0.0037647	TwdlU	NO	NO
FBgn0034800	0.569699	0.126495	0.000164917	CG3788	NO	NO
FBgn0039758	0.570809	0.193305	0.0236806	CG9737	NO	NO
FBgn0012036	0.578027	0.135732	0.000434063	Aldh	NO	NO
FBgn0038804	0.578043	0.100122	3.93065e-07	CG10877	NO	NO
FBgn0062928	0.579822	0.0927601	2.6146e-08	pncr009:3L	NO	NO
FBgn0037151	0.581189	0.192775	0.0205718	CG7130	NO	NO
FBgn0015872	0.581437	0.115204	1.58908e-05	Drip	NO	NO
FBgn0030545	0.583434	0.0953396	5.66113e-08	CG11590	YES	NO
FBgn0033188	0.583739	0.0998536	2.66283e-07	Drat	NO	NO
FBgn0025726	0.58396	0.129225	0.00015507	unc-13	NO	NO
FBgn0027790	0.588308	0.0649851	2.61837e-17	GV1	NO	YES
FBgn0036848	0.588456	0.0855983	5.31712e-10	CG10424	YES	NO
FBgn0038407	0.591174	0.166035	0.00458241	CG6126	NO	NO
FBgn0039896	0.592111	0.19114	0.016618	yellow-h	NO	NO
FBgn0031643	0.593082	0.0894625	2.6654e-09	CG3008	YES	NO
FBgn0038419	0.593296	0.189576	0.0153944	CG14879	NO	NO
FBgn0021944	0.594608	0.117935	1.62515e-05	Coprox	YES	YES
FBgn0030792	0.595123	0.0897693	2.6654e-09	CG4789	YES	NO
FBgn0038151	0.596757	0.0986748	8.587e-08	yellow-e2	NO	NO
FBgn0038353	0.597063	0.186531	0.01274	CG5399	NO	NO
FBgn0030362	0.600972	0.144068	0.000597052	regucalcin	NO	NO
FBgn0038034	0.601453	0.175121	0.00671385	Cyp9f3Psi	NO	NO
FBgn0035308	0.605818	0.117718	9.91798e-06	CG15822	NO	NO
FBgn0063127	0.606866	0.121957	2.2283e-05	pncr002:3R	NO	NO
FBgn0030661	0.607418	0.193085	0.0147847	CG8105	NO	NO
FBgn0030559	0.60819	0.178545	0.00729829	CG13404	NO	NO
FBgn0267030	0.609359	0.189673	0.0123817	CR45474	NO	NO
FBgn0000046	0.612119	0.126558	4.04716e-05	Act87E	NO	NO
FBgn0035293	0.612192	0.176539	0.00609747	CG5687	NO	NO
FBgn0250816	0.617309	0.1903	0.0114863	AGO3	NO	NO
FBgn0051467	0.62013	0.149902	0.000681552	CG31467	NO	NO
FBgn0038967	0.622028	0.192161	0.0117421	CG13847	NO	NO
FBgn0028833	0.623423	0.0896892	3.13302e-10	Dak1	NO	NO
FBgn0032495	0.62351	0.181999	0.00687256	CG16820	NO	NO
FBgn0015831	0.624535	0.170687	0.00340436	Rtnl2	NO	NO
FBgn0030793	0.625835	0.0927418	1.23613e-09	CG9125	NO	NO
FBgn0001179	0.629534	0.0888937	1.29928e-10	hay	NO	NO
FBgn0053178	0.631169	0.165686	0.00213468	CG33178	NO	NO
FBgn0010039	0.631353	0.14579	0.000330095	GstD3	NO	NO
FBgn0268063	0.632765	0.108829	3.14776e-07	ltl	NO	NO
FBgn0037354	0.636084	0.101593	2.48087e-08	CG12171	YES	NO
FBgn0267323	0.637797	0.193673	0.0101218	CR45759	NO	NO
FBgn0040801	0.640376	0.149536	0.000398074	CG13053	NO	NO
FBgn0040001	0.64113	0.172562	0.00287569	FASN3	NO	NO
FBgn0029710	0.644523	0.14048	0.00011795	CG3568	NO	NO
FBgn0036262	0.646865	0.192176	0.00822989	CG6910	NO	NO
FBgn0052207	0.648303	0.11145	3.11536e-07	CR32207	NO	NO
FBgn0264821	0.651471	0.184276	0.00496473	CR44029	NO	NO
FBgn0032235	0.652725	0.141368	0.000105467	CG5096	NO	NO
FBgn0027600	0.658347	0.121081	2.35713e-06	obst-B	NO	NO
FBgn0039851	0.65843	0.0865746	3.22135e-12	mey	NO	YES
FBgn0069056	0.658937	0.187787	0.0054128	CG33226	NO	NO
FBgn0051141	0.660092	0.175724	0.00254633	CG31141	NO	NO
FBgn0266237	0.670302	0.192188	0.0057228	CR44932	NO	NO
FBgn0039930	0.676354	0.115258	2.3826e-07	CG11077	NO	NO
FBgn0262509	0.678717	0.154151	0.000247514	nrm	NO	NO
FBgn0029170	0.681261	0.146641	9.34916e-05	TwdlT	NO	NO
FBgn0041627	0.684872	0.110599	3.69273e-08	Ku80	NO	NO
FBgn0051549	0.685668	0.127431	3.11688e-06	CG31549	YES	NO
FBgn0039625	0.688027	0.0919168	7.8091e-12	beta4GalNAcTB	YES	YES
FBgn0039821	0.69716	0.193376	0.00402057	CG15556	NO	NO
FBgn0264823	0.698248	0.183563	0.0021658	CR44031	NO	NO
FBgn0024912	0.698459	0.158495	0.0002447	agt	YES	NO
FBgn0029831	0.701489	0.130007	2.90509e-06	CG5966	NO	NO
FBgn0266691	0.702608	0.193213	0.00366358	CR45181	NO	NO
FBgn0054054	0.703381	0.189128	0.00284978	CG34054	NO	NO
FBgn0031022	0.708162	0.11092	1.20656e-08	CG12204	YES	NO
FBgn0031886	0.713749	0.0902052	3.44049e-13	Nuf2	NO	NO
FBgn0265651	0.715915	0.186444	0.00194052	CR44458	NO	NO
FBgn0031275	0.718094	0.192927	0.00282976	GABA-B-R3	NO	NO
FBgn0262869	0.72047	0.171227	0.000523223	Gfrl	NO	NO
FBgn0034312	0.721998	0.162926	0.000221057	CG10916	YES	NO
FBgn0037433	0.723993	0.0791188	1.08623e-17	CG17919	NO	NO
FBgn0033809	0.724332	0.191999	0.00240568	CG4630	NO	NO
FBgn0266347	0.725117	0.192486	0.00244344	nAChRalpha4	NO	NO
FBgn0267624	0.735633	0.171897	0.000400877	CR45962	NO	NO
FBgn0041183	0.735694	0.193705	0.00220562	Tep1	NO	NO
FBgn0029839	0.745431	0.192518	0.00173338	CG4660	NO	NO
FBgn0010401	0.747892	0.164109	0.000132149	Os-C	NO	NO
FBgn0267073	0.757967	0.184337	0.000740303	CR45517	NO	NO
FBgn0037525	0.759086	0.117397	7.34165e-09	CG17816	NO	NO
FBgn0034583	0.763607	0.099679	2.20328e-12	CG10527	NO	NO
FBgn0020385	0.764751	0.104402	2.39078e-11	pug	YES	NO
FBgn0032956	0.767813	0.115764	2.65349e-09	Cul2	YES	NO
FBgn0037150	0.770936	0.100268	1.84002e-12	CG7133	NO	NO
FBgn0036117	0.774476	0.175676	0.000243587	CG6321	NO	NO
FBgn0034729	0.778401	0.175645	0.000221057	CG10344	NO	NO
FBgn0031969	0.786117	0.182495	0.000361152	pes	NO	NO
FBgn0046880	0.787662	0.167577	7.3854e-05	Obp56b	NO	NO
FBgn0035788	0.788833	0.162261	3.65385e-05	CG8541	NO	NO
FBgn0265888	0.789452	0.192036	0.00074155	CR44677	NO	NO
FBgn0037537	0.792565	0.0831899	3.37943e-19	CG2767	NO	YES
FBgn0035193	0.798294	0.136635	2.68812e-07	CG9192	NO	NO
FBgn0267456	0.80697	0.180894	0.000198346	CR45806	NO	NO
FBgn0030588	0.812408	0.176216	0.000107498	CG9521	NO	NO
FBgn0027843	0.819455	0.136882	1.22226e-07	CAH2	NO	NO
FBgn0038313	0.832535	0.168192	2.48628e-05	CG4338	YES	NO
FBgn0053958	0.839427	0.191264	0.000262196	CG33958	NO	NO
FBgn0038260	0.845775	0.183791	0.000111634	CG14855	NO	NO
FBgn0053302	0.853232	0.173382	2.81546e-05	Cpr31A	NO	NO
FBgn0263974	0.853513	0.111815	2.65902e-12	qin	NO	NO
FBgn0264942	0.855267	0.170851	1.92321e-05	CR44111	NO	NO
FBgn0036194	0.856277	0.133211	9.21811e-09	CG11652	YES	NO
FBgn0266579	0.863067	0.192836	0.000186681	tau	NO	NO
FBgn0036826	0.874762	0.181933	4.56528e-05	arx	YES	NO
FBgn0000036	0.882423	0.193674	0.000132446	nAChRalpha1	NO	NO
FBgn0051720	0.88346	0.180584	3.19104e-05	mthl15	NO	NO
FBgn0029833	0.885065	0.0915074	9.56236e-20	MCTS1	YES	NO
FBgn0036605	0.886466	0.188211	7.0864e-05	CG13041	NO	NO
FBgn0035167	0.886999	0.152757	3.27821e-07	Gr61a	NO	NO
FBgn0262524	0.888811	0.136282	5.31351e-09	ver	NO	NO
FBgn0023416	0.90685	0.128772	1.6787e-10	Ac3	NO	NO
FBgn0264721	0.912986	0.193628	6.92942e-05	CR43989	NO	NO
FBgn0051287	0.927512	0.18142	1.17318e-05	CG31287	NO	NO
FBgn0037046	0.937916	0.176873	4.58657e-06	CG10581	NO	NO
FBgn0043550	0.939515	0.16021	2.42588e-07	Tsp68C	NO	NO
FBgn0266849	0.945143	0.127264	1.20509e-11	CR45310	NO	NO
FBgn0051740	0.957521	0.189727	1.58908e-05	CG31740	NO	NO
FBgn0264911	0.965411	0.187521	9.85474e-06	CG44102	NO	NO
FBgn0050016	0.97644	0.190489	1.09667e-05	CG30016	NO	NO
FBgn0052057	0.982842	0.173259	6.81897e-07	dpr10	NO	NO
FBgn0025640	0.987035	0.114905	1.3418e-15	CG13369	NO	NO
FBgn0035636	1.01518	0.178158	5.93442e-07	Cralbp	NO	NO
FBgn0262620	1.01582	0.1937	6.10101e-06	CR43144	NO	NO
FBgn0035724	1.02323	0.193126	4.66263e-06	CG10064	NO	NO
FBgn0022981	1.02356	0.120577	3.16808e-15	rpk	NO	NO
FBgn0262123	1.03016	0.160093	8.88354e-09	l(2)41Ab	NO	NO
FBgn0011288	1.03243	0.19371	4.00597e-06	Snap25	NO	NO
FBgn0037503	1.03283	0.0879501	3.12601e-29	CG14598	NO	NO
FBgn0052205	1.03321	0.140931	2.30642e-11	CR32205	NO	NO
FBgn0026361	1.04869	0.102914	6.0855e-22	sep5	NO	NO
FBgn0263257	1.05559	0.177015	1.39276e-07	Cngl	NO	NO
FBgn0030607	1.05696	0.162346	5.68238e-09	dob	NO	NO
FBgn0039108	1.07929	0.166872	7.31188e-09	CG10232	NO	NO
FBgn0267635	1.0944	0.189276	3.75387e-07	CR45973	NO	NO
FBgn0267205	1.09604	0.186495	2.27178e-07	CR45645	NO	NO
FBgn0024841	1.10994	0.0986602	8.36525e-27	Pcd	YES	NO
FBgn0052029	1.12412	0.112679	5.05852e-21	Cpr66D	NO	NO
FBgn0038038	1.1317	0.123293	8.53511e-18	CG5167	YES	NO
FBgn0033443	1.13453	0.126959	6.88866e-17	CG1698	NO	NO
FBgn0262580	1.13641	0.185924	5.85202e-08	CG43120	NO	NO
FBgn0085276	1.13725	0.179333	1.52903e-08	CG34247	NO	NO
FBgn0262563	1.14567	0.15554	1.86229e-11	CG43103	NO	NO
FBgn0038020	1.1551	0.155745	1.28478e-11	GstD9	NO	NO
FBgn0263415	1.18909	0.186771	1.31833e-08	CR43461	NO	NO
FBgn0004841	1.21813	0.191265	1.30858e-08	TkR86C	NO	NO
FBgn0266935	1.22598	0.190501	8.88354e-09	CR45386	NO	NO
FBgn0053653	1.23159	0.127621	1.12408e-19	Cadps	NO	NO
FBgn0039807	1.2347	0.167793	1.94527e-11	CG15546	NO	NO
FBgn0039915	1.26073	0.175197	5.83302e-11	Gat	NO	NO
FBgn0000557	1.26663	0.134274	8.13792e-19	Ef1alpha100E	NO	NO
FBgn0034844	1.31365	0.192475	7.45071e-10	CG9861	NO	NO
FBgn0087011	1.31648	0.0894635	4.39752e-46	CG41520	NO	NO
FBgn0037974	1.44421	0.181943	2.84983e-13	CG12224	NO	NO
FBgn0039972	1.49831	0.125407	2.85998e-30	CG17018	NO	NO
FBgn0038818	1.521	0.193292	4.80708e-13	Nep4	NO	NO
FBgn0027620	1.53317	0.120714	2.89781e-34	Acf1	YES	YES
FBgn0038642	1.53884	0.193699	2.73846e-13	Muc91C	NO	NO
FBgn0050414	1.57933	0.164412	1.69026e-19	CG30414	NO	NO
FBgn0263780	1.58401	0.142541	3.79575e-26	CG17684	NO	NO
FBgn0036368	1.6309	0.1498	4.46059e-25	CG10738	NO	NO
FBgn0034218	1.65494	0.192493	1.2787e-15	CG18467	NO	NO
FBgn0039748	1.65995	0.157686	2.1057e-23	CG15529	NO	NO
FBgn0038966	1.68726	0.176138	2.09175e-19	pinta	NO	NO
FBgn0038741	1.84697	0.153315	9.02847e-31	CG17186	YES	NO
FBgn0001208	1.93941	0.191285	9.98641e-22	Hn	NO	NO
FBgn0039129	1.97819	0.151107	1.92841e-36	RpS19b	NO	NO
FBgn0052373	2.15095	0.0910566	5.37798e-120	CG32373	NO	NO
FBgn0050287	2.30409	0.187694	5.75214e-32	CG30287	NO	NO
FBgn0267230	2.55175	0.193677	6.74212e-37	CR45670	NO	NO
FBgn0052318	2.58576	0.193692	7.44593e-38	CG32318	NO	NO
FBgn0052641	2.60656	0.18233	1.82099e-43	CG32641	NO	NO
FBgn0265299	2.63718	0.193469	1.89562e-39	CR44272	NO	NO
FBgn0038435	3.03707	0.186611	1.75015e-56	Gyc-89Da	NO	NO
FBgn0035608	3.56019	0.186418	4.12025e-78	blanks	NO	NO
